1 **Heliorhodopsin evolution is driven by photosensory promiscuity in monoderms**

2 Paul-Adrian Bulzu<sup>1</sup>, Vinicius Silva Kavagutti<sup>1,2</sup>, Maria-Cecilia Chiriac<sup>1</sup>, Charlotte  
3 D. Vavourakis<sup>3</sup>, Keiichi Inoue<sup>4</sup>, Hideki Kandori<sup>5,6</sup>, Adrian-Stefan Andrei<sup>7</sup>, Rohit  
4 Ghai<sup>1\*</sup>

5 <sup>1</sup>Department of Aquatic Microbial Ecology, Institute of Hydrobiology, Biology Centre of  
6 the Academy of Sciences of the Czech Republic, České Budějovice, Czech Republic.

7 <sup>2</sup>Department of Ecosystem Biology, Faculty of Science, University of South Bohemia,  
8 Branišovská 1760, České Budějovice, Czech Republic.

9 <sup>3</sup>EUTOPS, Research Institute for Biomedical Aging Research, University of Innsbruck,  
10 Austria.

11 <sup>4</sup>The Institute for Solid State Physics, The University of Tokyo, Kashiwa, Japan.

12 <sup>5</sup>Department of Life Science and Applied Chemistry, Nagoya Institute of Technology,  
13 Showa, Nagoya 466-8555, Japan.

14 <sup>6</sup>OptoBioTechnology Research Center, Nagoya Institute of Technology, Showa, Nagoya  
15 466-8555, Japan

16 <sup>7</sup>Limnological Station, Department of Plant and Microbial Biology, University of Zurich,  
17 Kilchberg, Switzerland.

18 \*Corresponding author: Rohit Ghai

19 Department of Aquatic Microbial Ecology, Institute of Hydrobiology, Biology Centre of  
20 the Academy

21 of Sciences of the Czech Republic, Na Sádkách 7, 370 05, České Budějovice, Czech  
22 Republic.

23 Phone: +420 387 775 881

24 Fax: +420 385 310 248

25 E-mail: [ghai.rohit@gmail.com](mailto:ghai.rohit@gmail.com)

26

27 The ability to harness Sun's electromagnetic radiation by channeling it into high-energy  
28 phosphate bonds empowered microorganisms to tap into a cheap and inexhaustible  
29 source of energy. Life's billion-years history of metabolic innovations led to the  
30 emergence of only two biological complexes capable of harvesting light: one based on  
31 rhodopsins and the other on (bacterio)chlorophyll. Rhodopsins encompass the most  
32 diverse and abundant photoactive proteins on Earth and were until recently canonically  
33 split between type-1 (microbial rhodopsins) and type-2 (animal rhodopsins) families.  
34 Unexpectedly, the long-lived type-1/type-2 dichotomy was recently amended through the  
35 discovery of heliorhodopsins (HeRs) (Pushkarev et al. 2018), a novel and exotic family of  
36 rhodopsins (i.e. type-3) that evaded recognition in our current homology-driven scrutiny  
37 of life's genomic milieu. Here, we bring to resolution the debated monoderm/diderm  
38 occurrence patterns by conclusively showing that HeR distribution is restricted to  
39 monoderms. Furthermore, through investigating protein domain fusions, contextual  
40 genomic information, and gene co-expression data we show that HeRs likely function as  
41 generalised light-dependent switches involved in the mitigation of light-induced oxidative  
42 stress and metabolic circuitry regulation. We reason that HeR's ability to function as  
43 sensory rhodopsins is corroborated by their photocycle dynamics (Pushkarev et al. 2018)  
44 and that their presence and function in monoderms is likely connected to the increased  
45 sensitivity to light-induced damage of these organisms (Maclean et al. 2009).

46 Type-1 and -2 rhodopsins families share a similar topological conformation and little or no  
47 sequence similarity among each other. Despite dissimilarities in function, structure and  
48 phylogeny, type-1 and -2 rhodopsins have a similar membrane orientation with their N-  
49 terminus being situated in the extracellular space. Identified during a functional  
50 metagenomics screen and characterised by low sequence similarity when compared to  
51 type-1 rhodopsins, HeRs attracted increasing research interest due to their peculiar  
52 membrane orientation (i.e. N-terminus in the cytoplasm and the C-terminus in the  
53 extracellular space)(Pushkarev et al. 2018), unusual protein structure (Kovalev et al. 2020)  
54 and controversial taxonomic distribution (Flores-Uribe, Hevroni, and Ghai 2019). While  
55 electrophysiological (Pushkarev et al. 2018), physicochemical (Tanaka et al. 2020) and  
56 structural (Shihoya et al. 2019; Kovalev et al. 2020) studies achieved great progress in  
57 elucidating a series of characteristics ranging from photocycle length (indicating no  
58 pumping activity) to detailed protein organization, they provide no data regarding the  
59 biological function of HeRs. Moreover, polarized opinions regarding the putative  
60 ecological role and taxonomic distribution of HeR-encoding organisms (Flores-Uribe,  
61 Hevroni, and Ghai 2019; Kovalev et al. 2020) call for the use of novel approaches in  
62 establishing HeR functionality. This work draws its essence from the tenet that functionally  
63 linked genes within prokaryotes are co-regulated, and thus occur close to each other  
64 (Aravind 2000; Huynen et al. 2000). Within this framework, the functions of  
65 uncharacterised genes (i.e. HeRs) can be inferred from their genomic surroundings. Here  
66 we couple HeR's distributional patterns with contextual genomic information involving  
67 protein domain fusions and operon organization, and gene expression data to shed light  
68 on HeRs functionality.

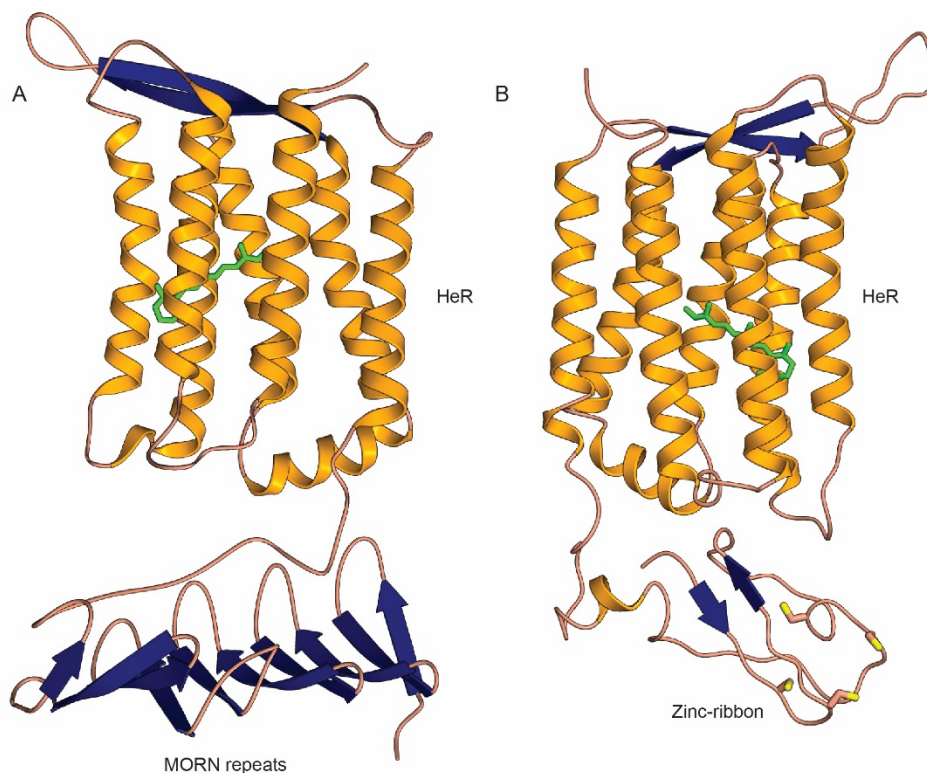

69  
70 **Figure 1.** Modelled three-dimensional (3D) structures of MORN-HeR and ZnF-HeR protein  
71 domain fusions. (A) 3D model of a heliorhodopsin (HeR) containing three N-terminal  
72 MORN domain repeats. (B) 3D model of a HeR containing an N-terminal Zn ribbon motif.  
73 Both models are oriented with the extracellular side up and intracellular side down.  
74 Retinal is coloured green and cysteine residues are depicted with yellow-topped orange  
75 sticks.

76 Previous assessments of taxonomic distribution of HeRs reported conflicting data  
77 regarding their presence in monoderm (Flores-Uribe, Hevroni, and Ghai 2019) and  
78 diderm (Kovalev et al. 2020) prokaryotes. In order to accurately map HeR taxonomic  
79 distribution we used the GTDB database (release 89), since it contains a wide-range of  
80 high-quality genomes derived from isolated strains and environmental metagenome-  
81 assembled genomes, classified within a robust phylogenomic framework (Parks et al.  
82 2020). By scanning 24,706 genomes, we identified 450 *bona fide* HeR sequences  
83 (topology: C-terminal inside and N-terminal outside, seven transmembrane helices and a  
84 SxxxK motif in helix 7; Supplementary Table S1) spanned across 17 phyla (out of 151;  
85 Supplementary Table S2). In order to assign HeR-containing genomes to either  
86 monoderm or diderm categories, we employed a set of 27 manually curated protein  
87 domain markers that are expected to be restricted to organisms possessing double-  
88 membrane cellular envelopes (i.e. diderms) (Taib et al. 2020). While most analyses were  
89 expected to be influenced by varying levels of genome completeness, we found that a  
90 conservative criterion of presence of at least ten marker domains singled out all diderm  
91 lineages (i.e. Negativicutes, Halanaerobiales and Limnochondria) (Taib et al. 2020;  
92 Megrian et al. 2020) within the larger monoderm phylum Firmicutes, apart from correctly  
93 identifying other well-known diderms. Except for three genomes (one each belonging to

94 Myxococcota, Spirochaetota and Dictyoglomota phyla), all other HeR occurrences were  
 95 restricted to monoderms (Supplementary Table S2). Examination of the HeR-encoding  
 96 Myxococcota contig by querying its predicted proteins against the RefSeq and GTDB  
 97 databases revealed it to be an actinobacterial contaminant. The *Spirochaeta* genome was  
 98 incomplete (60% estimated completeness) and only encoded for two outer membrane  
 99 marker genes, making any inferences regarding its affiliation to monoderm or diderm  
 100 bacteria impossible. However, we could not rule out that this genome could belong to a  
 101 member lacking lipopolysaccharides (LPS) (Taib et al. 2020). The Dictyoglomota genome  
 102 belongs to an isolate, and despite its high completeness, it encodes only five markers.  
 103 Combined with the notion that Dictyoglomota are known to have atypical membrane  
 104 architectures (Saiki et al. 1985), the presence of only five markers points towards the  
 105 absence of a classical diderm cell envelope. Apart from these exceptions, all other HeR-  
 106 encoding genomes are monoderm and, at least within this collection, we find no strong  
 107 evidence of HeRs being present in any organism that is conclusively diderm. We also  
 108 identified HeRs in several assembled metagenomes and metatranscriptomes (see  
 109 Methods). For improved resolution of taxonomic origin, we considered only contigs of at  
 110 least 5 Kb in length ( $n = 1,340$  from metagenomes and  $n = 4$  from metatranscriptomes).  
 111 Following a strict approach to taxonomy assignment (i.e. at least 60 % genes giving best-  
 112 hits to the same phylum and not just majority-rule), we could designate a phylum for most  
 113 HeRs. Without any exception, we found that all the contigs that received robust taxonomic  
 114 classification ( $n = 1,319$ ) belonged to known monoderm phyla (Supplementary Table S3).

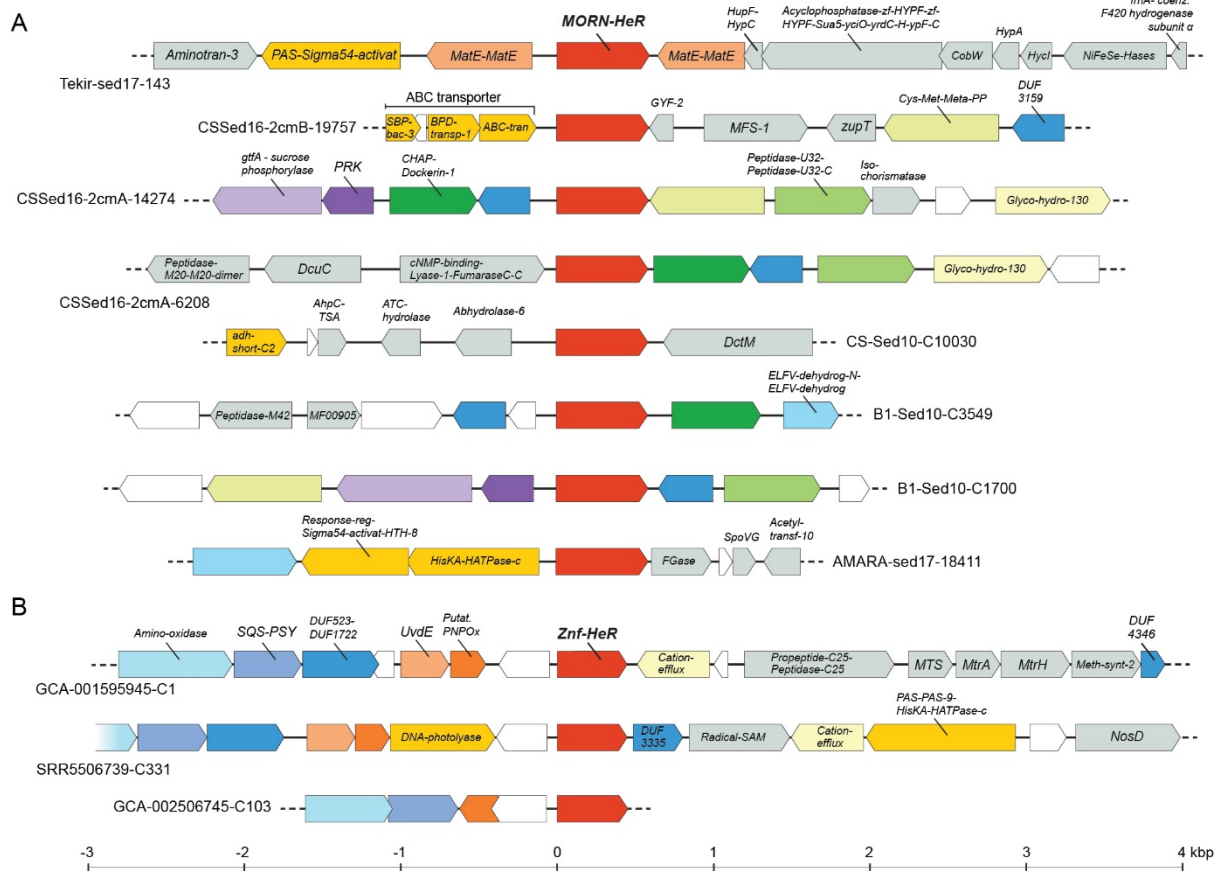

115

116 **Figure 2.** Genomic context of HeR-protein domain fusion genes. A) Representative  
 117 MORN-HeR encoding contigs identified in strictly anaerobic Firmicutes. B) Contigs  
 118 encoding Znf-HeR domain fusions. Neighbouring genes were depicted within an interval

119 spanning ~ 7 kb, centered on HeR. Genes occurring only once within the considered  
120 intervals are coloured grey; genes encoding HisKA, PAS, regulatory domains, as well as  
121 other discussed HeR neighbours are depicted bright yellow. Homologous genes  
122 occurring multiple times found within each category of HeR-protein fusion contigs are  
123 depicted using matching colours. Hypothetical genes are white.

124 Domain fusions with rhodopsins are recently providing novel insights into the diverse  
125 functional couplings that enhance the utility of a light sensor, e.g. the case of a  
126 phosphodiesterase domain fused with a type-1 rhodopsin (Ikuta et al. 2020). As far as we  
127 are aware, no domain fusions have been described for HeRs yet. In our search for such  
128 domain fusions that may shed light on HeR functionality, the MORN repeat (Membrane  
129 Occupation and Recognition Nexus, PF02493) was found in multiple copies (typically 3) at  
130 the cytoplasmic N-terminus of some HeRs (n = 36). A tentative 3D model for a  
131 representative MORN-HeR could be generated and is shown in [Figure 1A](#). These MORN-  
132 HeR sequences were phylogenetically restricted to two environmental branches of MAGs  
133 recovered from haloalkaline sediments that affiliate to the family *Syntrophomonadaceae*  
134 (phylum Firmicutes) (Timmers et al. 2018; Vavourakis et al. 2018, 2019) ([Supplementary](#)  
135 [Figure 1](#)). The prototypic MORN repeat, consisting of 14 amino acids with the consensus  
136 sequence YEGEWxNGKxHGYG, was first described in 2000 (Takeshima et al. 2000) from  
137 junctophilins present in skeletal muscle and later recognized to be ubiquitous in both  
138 eukaryotes and prokaryotes (El-Gebali et al. 2019). This conserved signature can be seen  
139 in the alignment of MORN-repeats fused to HeRs ([Supplementary Figure 2](#)). MORN-  
140 repeats have been shown to bind to phospholipids (Im et al. 2007; Ma et al. 2006),  
141 promoting stable interactions with plasma membranes (Takeshima et al. 2000) and also  
142 function as protein-protein interaction modules involved in di- and oligomerization (Sajko  
143 et al. 2020). They are expected to be intracellular and provide a large putative interaction  
144 surface (either with other MORN-HeRs or other proteins). A widespread adaptation of  
145 bacteria to alkaline environmental conditions is the increased fluidity of their plasma  
146 membranes achieved by the incorporation of branched-chain and unsaturated fatty acids  
147 which ultimately influences the configuration and activity of membrane integral proteins  
148 such as ATP synthases and various transporters (Kanno et al. 2015). Microbial rhodopsins  
149 typically associate as oligomers in vivo, which is also the case with heliorhodopsins that  
150 are known to form dimers (Shibata et al. 2018; Shihoya et al. 2019). The presence of  
151 MORN-repeats in HeRs exclusively within extreme haloalkaliphilic bacteria (class  
152 Dethiobacteria) may be accounted for via their potential role in stabilizing HeR dimers in  
153 conditions of increased membrane fluidity ([Supplementary Figure 4](#)). Another possibility  
154 would be the interaction of MORN-repeats with other MORN-repeat containing proteins  
155 encoded in these MAGs. We could indeed identify multiple MORN-protein domain  
156 fusions co-occurring in genomes of analysed Dethiobacteria ([Supplementary Figures 1](#)  
157 [and 3](#); [Supplementary Table S15](#)). Even though the nature of interactions amongst these  
158 proteins with intracellular MORN-repeats is unclear, they raise the possibility that MORN-  
159 repeats act as downstream transducers of conformational changes occurring in HeRs. Such  
160 tandem repeat structures may function as versatile target recognition sites capable of  
161 binding not only small molecules like nucleotides but also peptides and larger proteins  
162 (Kajava 2012). If true, this would render HeRs as sensory rhodopsins. In support of this, we  
163 found several genes in close proximity to MORN-HeRs encoding signature protein

164 domains (e.g. PAS, HisKA, HATPase\_c) that are known to be involved in histidine kinase  
 165 signalling (Aravind, Iyer, and Anantharaman 2010) (Figure 2A).

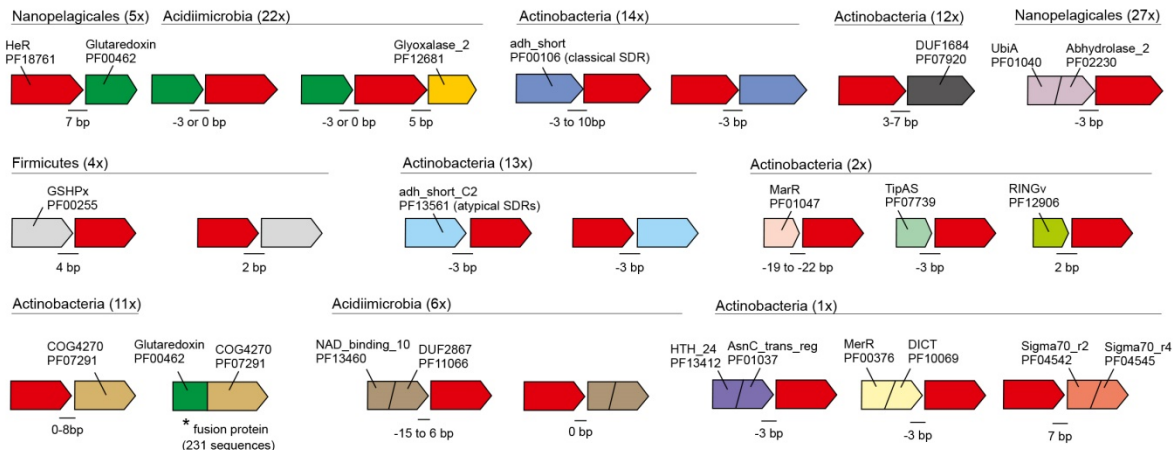

166  
 167 **Figure 3.** Schematic representation of genes that may be transcriptionally linked to HeRs.  
 168 Taxonomic categories and number of occurrences are shown at the top of each putative  
 169 operon. Intergenic distances (in bp) are indicated at gene junctions. Negative distance  
 170 values indicate overlapping genes. Pfam or COG identifiers are used to represent domain  
 171 architectures. A star (\*) indicates a fused gene (two domains: Glutaredoxin and COG4270)  
 172 found in at least 473 genomes from GTDB and 231 unique sequences in UniProt  
 173 suggesting a functional linkage of COG4270 with Glutaredoxin.

174 As no other obvious domains were found to be fused with HeRs using standard profile  
 175 searches, we examined all N and C-terminal extensions as well as loops longer than 50 aa  
 176 by performing more sensitive profile-profile searches using HHPred (Zimmermann et al.  
 177 2018). We found at least ten N-terminal extensions of HeRs (ntv1-ntv10), 22 variants of  
 178 ECL1 (extracellular loop 1), a single type of loop extension for ICL2 (intracellular loop 2)  
 179 and three variants of ICL3 (intracellular loop 3). A complete listing of all alignments and  
 180 summary results of HHpred can be found in [Supplementary Table S8](#). Remarkably, we  
 181 found significant matches in a set of six sequences (all originating from  
 182 Thermoplasmatales archaea) to zinc ribbon proteins (Pfam domain zinc\_ribbon\_4) at the  
 183 N-terminus of some heliorhodopsins (these extensions are termed N-terminal variant 1 or  
 184 ntv1, [Supplementary Table S8](#)). Zinc ribbons belong to the larger family of Zinc-finger  
 185 domains (Krishna et al., 2003). A CxxC-17x-CxxC was found in this region that likely  
 186 coordinates a metal (e.g., zinc or iron). These CxxC\_CxC type motifs are common to a  
 187 wider family of Zinc finger-like proteins that were initially found to bind to DNA and later  
 188 shown to be capable of binding to RNAs, proteins and small molecules (Krishna,  
 189 Majumdar, and Grishin 2003). Similar motifs are also seen in Rubredoxins and  
 190 Cys\_rich\_KTR domains. We term these fused ntv1 protein variants as Znf-HeRs (Zinc finger  
 191 Heliorhodopsins). A modelled structure for a representative Znf-HeR is shown in [Figure 1](#).  
 192 In one contig encoding a Znf-HeR we identified a histidine kinase that could be  
 193 functionally linked ([Figure 2B](#)). Notably, most identified Znf-HeRs are flanked by genes  
 194 known to be triggered by light exposure and play key roles in photoprotection (i.e.  
 195 carotenoid biosynthesis genes Lycopene cyclase, phytoene desaturase - Amino-oxidase,  
 196 squalene/phytoene synthase - SQS-PSY) and UV-induced DNA damage repair (DNA  
 197 photolyases, UV-DNA damage endonucleases - UvdE) (Rastogi et al. 2010; Yatsunami et  
 198 al. 2014). Recent research showed that HeRs from Thermoplasmatales archaea (*TaHeR*)

199 and uncultured freshwater Actinobacteria (48C12) (for which the structure is resolved and  
200 lacks the ntv1 extension) might bind zinc (Hashimoto et al. 2020). As the zinc binding site  
201 could not be precisely identified it was suggested that it could be located in the  
202 cytoplasmic part, and responsible for modifying the function of HeR. Our discovery of Znf-  
203 HeRs offers additional, more direct indications of the role of zinc in the possible  
204 downstream signalling by HeRs.

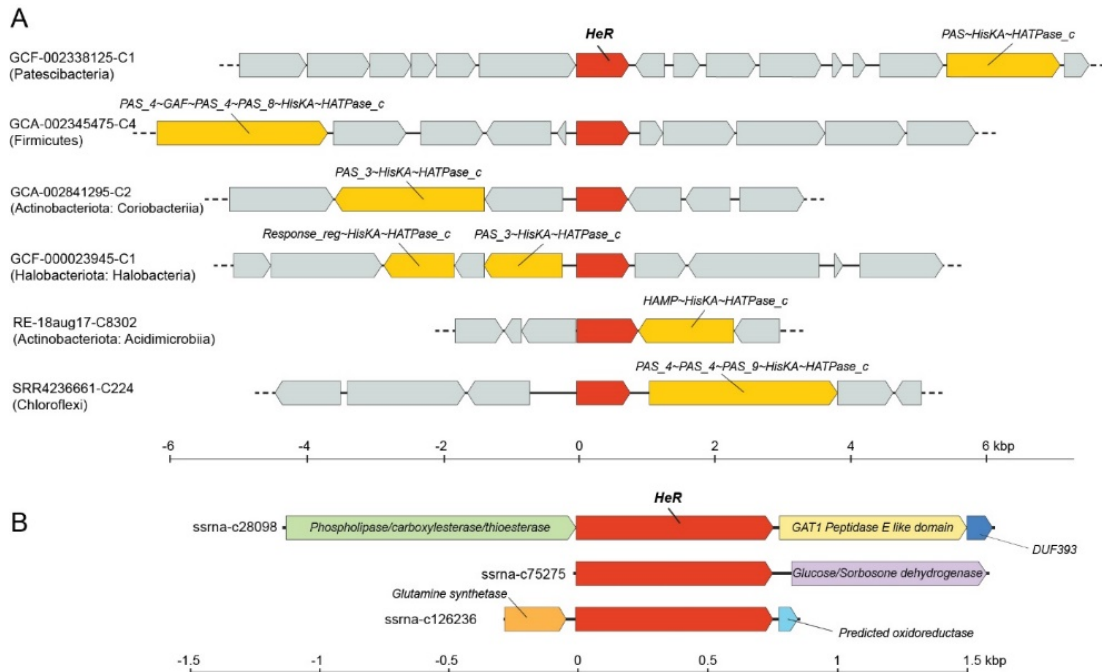

205  
206 **Figure 4.** A) Genes encoding HisKA domain signalling proteins identified in the proximity  
207 of HeR genes from diverse phyla. All genes containing HisKA domains are coloured bright  
208 yellow, HeRs are shown in red, and all other genes in grey. B) Transcripts obtained by  
209 strand-specific metatranscriptomics from freshwater encoding genes co-expressed with  
210 HeR.

211 Given the large number of long contigs encoding HeRs (from genomes and  
212 metagenomes), we sought to identify candidate genes that could be transcribed together  
213 with HeRs (in the same operon). We used the following strict criteria for obtaining such  
214 genes 1) the intergenic distance between such a gene and the HeR must be less than 10  
215 bp, and 2) the gene must be located on the same strand. A number of interesting  
216 candidates emerged in this analysis with the most frequent ones being summarized in  
217 Figure 3 (a complete table can be found in Supplementary Table S9). We identified  
218 multiple instances in which genes with Glutaredoxin and GSHPx PFAM domains were  
219 found adjacent to HeRs (n = 31). Glutaredoxins are small redox proteins with active  
220 disulphide bonds that utilize reduced glutathione as an electron donor to catalyze thiol-  
221 disulphide exchange reactions. They are involved in a wide variety of critical cellular  
222 processes like the maintenance of cellular redox state, iron and redox-sensing, and  
223 biosynthesis of iron-sulphur clusters (Lillig, Berndt, and Holmgren 2008; Rouhier et al.  
224 2010). Glutathione is also used by glutathione peroxidase (GSHPx) to reduce hydrogen  
225 peroxide and peroxide radicals i.e. as an anti-oxidative stress protection system (Bhabak  
226 and Mugesh 2010). Additionally, there are also instances where Glutaredoxin and genes  
227 containing Glyoxalase\_2 domains may be co-transcribed with HeRs. Glyoxalases, in

228 concert with glutaredoxins, are critical for detoxification of methylglyoxal, a toxic  
229 byproduct of glycolysis (Ferguson et al. 1998). Moreover, adjacent to HeRs we find at least  
230 three instances where a catalase gene is also present (in Actinobacteria; see  
231 Supplementary Figures S10-S11). Collectively, these observations suggest a role for HeRs  
232 in oxidative stress mitigation. In one case, we found a gene encoding the DICT domain  
233 (Figure 3) which is frequently associated to GGDEF, EAL, HD-GYP, STAS, and two-  
234 component system histidine kinases. Notably, it has been predicted to have a role in light  
235 response (Aravind, Iyer, and Anantharaman 2010).

236 Although we assembled contigs encoding HeRs from previously published  
237 metatranscriptomes, the lack of strand-specific transcriptomes hampered any clear  
238 conclusions on whether or not genes adjacent to HeRs are indeed co-transcribed, leaving  
239 open the possibility that they might simply be artefacts of assembly (Zhao et al. 2015). In  
240 order to gather more definitive evidence for co-transcription we performed strand-  
241 specific metatranscriptome sequencing for a freshwater sample (see Methods). We  
242 recovered six HeR-encoding transcripts that were > 1 kb in length. All these transcripts are  
243 predicted to originate from highly abundant freshwater Actinobacteria with streamlined  
244 genomes (four transcripts from "*Ca. Planktophilia*" and two from "*Ca. Nanopelagicus*")  
245 (Supplementary Table S12) (Neuenschwander et al. 2018). Overall, there are three types  
246 of transcripts based upon gene content: class1 - encoding Glutamine synthetase catalytic  
247 subunit and NAD<sup>+</sup> synthetase; class2 - encoding a hydrolase, a peptidase and a DUF393  
248 domain containing protein, and class3 - encoding glucose/sorbosone dehydrogenase  
249 (GSDH) (Figure 4B and Supplementary Table S12). A common theme for glutamine  
250 synthetase and NAD<sup>+</sup> synthetase is that both utilize ammonia and ATP to produce  
251 glutamine and NAD<sup>+</sup> respectively. Moreover, some NAD<sup>+</sup> synthetases may be glutamine  
252 dependent (Resto, Yaffe, and Gerrata 2009). Glutamine synthetase in particular is a key  
253 enzyme for nitrogen metabolism in prokaryotes at large (García-Domínguez, Reyes, and  
254 Florencio 1999). For hydrolases and peptidases, the function prediction is somewhat  
255 broad. Glucose/sorbosone dehydrogenase catalyses the production of gluconolactone  
256 from glucose (Oubrie et al. 1999). Therefore, it appears that all six HeRs are generally co-  
257 transcribed with genes involved in nitrogen assimilation and degradation/assimilation of  
258 sugars and peptides. This would suggest that these processes are also influenced by light,  
259 with such a link between light-dependent increase in sugar uptake and metabolic activity  
260 being recently proposed in non-phototrophic Actinobacteria (Maresca et al. 2019). Light  
261 also triggers photosynthetic activity, increasing availability of sugars and other nutrients  
262 (e.g. glutamine and ammonia) for heterotrophs. In this vein, a link between a light sensing  
263 mechanism, e.g. via heliorhodopsins, may lead to elevated metabolic activity.  
264 In a previous study, histidine kinases were deemed absent in the vicinity of HeRs (Kovalev  
265 et al. 2020). Given that our initial analyses predicted a sensory function, we examined  
266 genomic regions spanning 10 kb up- and downstream of HeRs. Already in the case of  
267 MORN-HeRs and Znf-HeRs we observed histidine kinase signalling components in close  
268 proximity to them (Figure 2). In our search we detected multiple instances of histidine  
269 kinases (HisKA) fused with PAS, GAF, MCP\_Signal, HAMP or HATPase\_c domains in the  
270 gene neighbourhoods of HeRs in distinct phyla (e.g. Actinobacteria, Chloroflexi,  
271 Patescibacteria, Firmicutes, Dictyoglomota, Thermoplasmata) (Figure 4B; more details  
272 in Supplementary Figures S5-S14). Moreover, in many cases multiple response regulator  
273 genes were present in the same regions (Pfam domains Response\_reg, Trans\_reg\_C).



274 Less frequently, GGDEF and EAL domains, usually associated with bacterial signalling  
275 proteins, were also present. Using overrepresentation analysis (Shmakov et al. 2018), we  
276 found that the occurrence of two-component system protein domains in the vicinity of  
277 HeRs is statistically significant (see Methods and [Supplementary Table S11](#)). In addition to  
278 these two-component system proteins, the same regions also appear enriched in redox  
279 proteins (e.g. thioredoxin, peroxidase, catalase). The close association of two-component  
280 systems, genes involved in oxidative stress mitigation and HeRs points towards a  
281 functional interaction.

## 282 **Conclusions**

283 In conclusion, contextual genomic information shows that monoderm prokaryotes use  
284 HeRs in multiple mechanisms for the activation of downstream metabolic pathways post  
285 light sensing. Furthermore, we offer tantalizing clues regarding the involvement of HeRs  
286 in multiple cellular processes and add new lines of inquiry for the primary role of HeRs in  
287 light signal transduction. Additional support for the role of HeRs in light sensing is  
288 inferred from the frequent association of HeRs with classical histidine kinases and  
289 associated protein domains in multiple phyla. Furthermore, multiple types of N-terminal  
290 domain fusions found in specific subfamilies of HeRs (i.e. MORN domains in  
291 haloalkaliphilic Firmicutes and Zinc ribbon type domains in Thermoplasmatales archaea)  
292 point to possible downstream signalling which may be effected by recruitment of  
293 additional, as yet unknown, partner proteins.

294 We further propose a critical role for HeRs in protecting monoderm cells from light-  
295 induced oxidative damage. In this sense, we observed a close association and probable  
296 transcriptional linkage of HeRs to glyoxylases and glutaredoxins (sometimes seen as  
297 overlapping genes). Given that light can induce the uptake and metabolism of sugars, as  
298 previously discussed for certain Actinobacteria (Maresca et al. 2019), it is expected that  
299 increased sugar availability resulting from photosynthesis leads to increased glycolytic  
300 activity in heterotrophic bacteria. Glycolysis also produces small amounts of toxic  
301 methylglyoxal that can be neutralized by the combined action of glyoxylases and  
302 glutaredoxins. In this sense, it appears that at least in some Actinobacteria, glyoxylases  
303 and glutaredoxins may be transcribed together with HeRs, but how the transcription is  
304 controlled remains unclear. Additional evidence of transcriptional linkages of HeRs to  
305 proteins like peroxiredoxin and catalase also imply a light-dependent activation, boosting  
306 the cellular response to light induced oxidative damage which may be critical for both  
307 aerobes and anaerobes. Evidence from strand-specific HeR transcripts originating from  
308 freshwater Actinobacteria suggests the further involvement of HeRs in nitrogen and sugar  
309 metabolism via glutamate synthase, NAD<sup>+</sup> synthases and glucose/sorbose  
310 dehydrogenases in these organisms.

311 Overall, the picture that emerges (at least for some organisms) is one of HeR's role in  
312 responding to light and transmitting the signal via histidine kinases. Downstream  
313 processes that are ultimately regulated are diverse, including possible roles for HeRs in  
314 the mitigation of light-induced oxidative damage and in the regulation of nitrogen  
315 assimilation and carbohydrate metabolism, processes that may benefit from a light-  
316 dependent activation through more efficient utilization of available resources.

317 Recent work has shown more support for the diderm-first ancestor (Coleman et al. 2020)  
318 and given the far broader distribution of type-1 rhodopsins in both mono- and di-derm  
319 organisms it appears likely that type-1 rhodopsins emerged prior to HeRs. The very  
320 restricted distribution of HeRs to monoderms would support this view as well. Even so,  
321 HeRs are not universally present in monoderms and when present, appear to be  
322 associated with diverse genes involved in signal transduction, oxidative stress mitigation,  
323 nitrogen and glucose metabolism. This would suggest they have been exapted as  
324 generalized sensory switches that may allow light-dependent control of metabolic activity  
325 in multiple lineages, somewhat similar to type-1 rhodopsins where minor modifications  
326 have led to emergence of a wide variety of ion-pumps (Kandori 2020). The frequent  
327 distribution of HeRs in aquatic environments (habitats characterised by increased light  
328 penetration), where they commonly occur within phylum Actinobacteriota, helps us to  
329 explain their monoderm-restricted presence. Abundant freshwater actinobacterial  
330 lineages are generally typified by lower GC content (Ghai, McMahon, and Rodriguez-  
331 Valera 2012) and increased vulnerability to oxidative stress damage (Kim et al. 2019). This  
332 susceptibility is also illustrated by actinobacterial phages that exhibit positive selection  
333 towards reactive oxygen species defense mechanisms (Kavagutti et al. 2019). Given the  
334 fact that monoderms are generally more sensitive to light-induced damage and  
335 corroborated with up-mentioned metabolic implications, we consider that HeRs evolved  
336 as sensory switches capable of triggering a fast response against photo-oxidative stress in  
337 prokaryotic lineages more sensitive to light.

## 338 **Methods**

339 **Metagenomes and metatranscriptomes.** We used previously published metagenomics  
340 and metatranscriptomics data from freshwaters (Andrei et al. 2019; Kavagutti et al. 2019;  
341 Mehrshad et al. 2018), haloalkaline brine and sediment (Vavourakis et al. 2018, 2019),  
342 brackish sediments (Bulzu et al. 2019), GEOTRACES cruise (Biller et al. 2018) and TARA  
343 expeditions (Salazar et al. 2019). In addition, we downloaded multiple environmental  
344 metagenomes (sludge, marine, pond, estuary, etc.) from EBI MGnify  
345 (<https://www.ebi.ac.uk/metagenomics/>) (Mitchell et al. 2020) and assembled them using  
346 Megahit v1.2.9 (D. Li et al. 2016). All contigs in this work are named or retain existing  
347 names that allow tracing them to their original datasets.

348 **Sequence search for *bona fide* rhodopsins.** Genes were predicted in metagenomics  
349 contigs using Prodigal (Hyatt et al. 2010). Candidate rhodopsin sequences were scanned  
350 with hmmsearch (Eddy 2011) using PFAM models (PF18761: heliorhodopsin, PF01036:  
351 bac\_rhodopsin) and only hits with significant e-values ( $< 1e-3$ ) were retained. Homologs  
352 for these sequences were identified by comparison to a known set of rhodopsin  
353 sequences (Bulzu et al. 2019) using MMSeqs2 (Hauser, Steinegger, and Söding 2016) and  
354 alignments were made using MAFFT-linsi (Katoh and Standley 2013). These alignments  
355 were used as input to Polyphobius (Käll, Krogh, and Sonnhammer 2005) for  
356 transmembrane helix prediction. Only those sequences that had seven transmembrane  
357 helices and either a SxxxK motif (for heliorhodopsins) or DxxxK motif (for  
358 proteorhodopsins) in TM7 were retained. In addition, we also screened the entire  
359 UniProtKB for HeRs. In total, we accumulated at least 4,108 (3,606+502) *bona fide* HeR  
360 sequences.

361 **Taxonomic classification of assembled contigs.** Contigs were dereplicated using cd-hit  
362 (W. Li and Godzik 2006) (95% sequence identity and 95% coverage). Only contigs  $\geq$  10 kb  
363 were retained for this analysis. A custom protein database was created by predicting and  
364 translating genes in all GTDB genomes (release 89) (Parks et al. 2020) using Prodigal  
365 (Hyatt et al. 2010). These sequences were supplemented with viral and eukaryotic  
366 proteins from UniProtKB (UniProt Consortium 2019). Best-hits against predicted proteins  
367 in contigs were obtained using MMSeqs2 (Hauser, Steinegger, and Söding 2016).  
368 Taxonomy was assigned to a contig (minimum length 5 kb) only if  $\geq$  60% of genes in the  
369 contig gave best-hits to the same phylum. All contigs that appeared to originate from  
370 diderms were cross-checked against NCBI RefSeq (accessed online on 15<sup>th</sup> December  
371 2020).

372 **Outer-envelope detection.** A set of protein domains found in genes encoding for the  
373 outer-envelope (Taib et al. 2020) was further reduced to include only those domains that  
374 were found mostly in known diderms. These domains were searched against the  
375 predicted proteins in all genomes in GTDB using hmmsearch (e-value  $<$  1e-3). The results  
376 are shown in [Supplementary Table S13](#).

377 **Protein function/structure predictions.** Predicted proteins were annotated using  
378 TIGRFAMs (Haft, Selengut, and White 2003) and COGs (Galperin et al. 2015). Domain  
379 predictions were carried out using the pfam\_scan.pl script against the PFAM database  
380 (release 32) (El-Gebali et al. 2019). Profile-profile searches were carried out online using  
381 the HHPred server (Zimmermann et al. 2018). Additional annotations were added using  
382 Interproscan (Mitchell et al. 2019). Protein structure predictions were carried out using the  
383 Phyre2 server (Kelley et al. 2015) and structures were visualized with CueMol  
384 (<http://www.cuemol.org/en/>).

385 **Domains overrepresentation near heliorhodopsin.** A subset of high-quality MAGs ( $n =$   
386 240) containing HeR-encoding genes flanked both up- and downstream by a minimum of  
387 10 genes were selected from GTDB (release 89) (Parks et al. 2020). For each genome, the  
388 probability of finding any particular domain by chance in a random subset of 20 genes  
389 was calculated using the hypergeometric distribution (without replacement) in R with the  
390 function *phyper* (stats package) (Johnson, Kemp, and Kotz 2005). In order to account for  
391 type I errors arising from multiple comparisons, hypergeometric test P-values were  
392 adjusted using the Benjamini-Hochberg procedure (Benjamini and Hochberg 1995).  
393 Further, we selected domains located in the proximity of HeR in at least 10% of genomes  
394 with low probability (FDR corrected P-value  $<$  0.05). This procedure that was initially  
395 employed for the whole GTDB genome collection was repeated for individual phyla  
396 containing HeR-encoding genes within at least five genomes.

397 **Strand-specific freshwater transcriptome sequencing and assembly.** Sampling was  
398 performed on the 16<sup>th</sup> of August 2020 at 9:00 in Řimov reservoir, Czech Republic,  
399 (48°50'54.4"N, 14°29'16.7"E) using a hand-held vertical Friedinger (2 L) sampler. A total  
400 of 20 L of water were collected from a depth of 0.5 m and immediately transported to the  
401 laboratory. Serial filtration was carried out by passing water sample through a 20  $\mu$ m pore  
402 size pre-filter mesh followed by a 5  $\mu$ m pore size PES filter (Sterlitech) and a 0.22  $\mu$ m pore  
403 size PES filter (Sterlitech, USA) using a Masterflex peristaltic pump (Cole-Palmer, USA).

404 Filtration was done at maximum speed for 15 minutes to limit cell lysis and RNA damage  
405 as much as possible. A total volume of 3.7 L was filtered during this time. PES filters (5 µm  
406 and 0.22 µm pore sizes) were loaded into cryo-vials pre-filled with 500 µl of DNA/RNA  
407 Shield (Zymo Research, USA) and stored at -80°C. RNA was extracted from filters using the  
408 Direct-zol RNA MicroPrep (Zymo Research, USA) after they had been previously thawed,  
409 partitioned, and subjected to mechanical lysis by bead-beating in ZR BashingBead™ Lysis  
410 tubes (with 0.1 and 0.5 mm spheres). DNase treatment was performed to remove  
411 genomic DNA during RNA extraction as an “in-column” step described in the Direct-zol  
412 protocol and was repeated after RNA elution, by using the Ambion Turbo DNA-free™ Kit  
413 (Life Technologies, USA). RNA was quantified using a NanoDrop® ND-1000 UV-Vis  
414 spectrophotometer (Thermo Fisher Scientific, USA) and integrity was verified by agarose  
415 gel (1%) electrophoresis. A total of 4.6 µg of RNA from the 0.22 µm pore size filter and 2.6  
416 µg from the 5 µm pore size filter were sent for dUTP-marking based strand-specific  
417 metatranscriptomic sequencing at Novogene ([www.novogene.com](http://www.novogene.com)). Following quality  
418 control at Novogene, samples were mixed into one single reaction, then subjected to  
419 rRNA depletion and used for stranded library preparation. Strand-specificity was achieved  
420 by incorporation of dUTPs instead of dTTPs in the second-strand cDNA followed by  
421 digestion of dUTPs by uracil-DNA glycosylase to prevent PCR amplification of this strand.  
422 Paired-end (PE 150 bp) sequencing was carried out using a Novaseq 6000 platform. A  
423 total of 166,213,184 raw sequencing reads, amounting to 24.9 Gb, were produced. *De*  
424 *novo* assembly of metatranscriptomic data was performed using rnaSPAdes v.3.14.1  
425 (Bushmanova et al. 2019) in reverse-forward strand-specific mode (--ss rf) with a custom k-  
426 mers list 29, 39, 49, 59, 69, 79, 89, 99, 109, 119, 127. A total of 156,235 hard-filtered  
427 transcripts of a minimum length of 1 kb were assembled. Protein coding sequences were  
428 predicted *de novo* using Prodigal (Hyatt et al. 2010) in metagenomic mode (-p meta).  
429 Protein domains were annotated by scanning with InterProScan (Mitchell et al. 2019) while  
430 PFAM (Protein Families) (El-Gebali et al. 2019) domains were identified using the publicly  
431 available perl script pfam\_scan.pl (<ftp://ftp.ebi.ac.uk/pub/databases/Pfam/Tools/>).  
432 Proteins were scanned locally using HMMER3 (Eddy 2011) against the COGs (Clusters of  
433 Orthologous Groups) (Galperin et al. 2015) HMM database (e-value < 1e-5) and the  
434 TIGRFAMs (TIGR Families) (Haft, Selengut, and White 2003) HMM collection with trusted  
435 score cutoffs. BlastKOALA (Kanehisa, Sato, and Morishima 2016) was used to assign KO  
436 identifiers (KO numbers). Annotations for representative transcripts encoding HeR are  
437 summarised in [Supplementary Table S12](#).

#### 438 **Data availability**

439 Sequence data generated in this study have been deposited in the European Nucleotide  
440 Archive (ENA) at EMBL-EBI under project accession number PRJEB35770 (run  
441 ERR5100021). The derived data that support the findings of this paper, including R code  
442 used for statistical analyses, are available in FigShare  
443 (<https://figshare.com/s/7bb42426f2ad5e891fec>). All other relevant data supporting the  
444 findings of this study are available within the paper and its supplementary information  
445 files.

446  
447  
448

## 449 **Acknowledgements**

450 P.-A.B., V.S.K. and R.G. were supported by the research grant 20-12496X (Grant Agency  
451 of the Czech Republic). V.S.K. was additionally supported by the research grant  
452 116/2019/P (Grant Agency of the University of South Bohemia in České Budějovice, 2019-  
453 2021). A.-Ş.A. was supported by Ambizione grant PZ00P3\_193240 (Swiss National  
454 Science Foundation). M.-C. C. was supported by the Program for the Support of  
455 Perspective Human Resources (PPLZ), Czech Academy of Sciences (Grant No.  
456 L200961953). K. I. was supported by Grants-in-Aid from the Japan Society for the  
457 Promotion of Science (JSPS) for Scientific Research (KAKENHI grant Nos. 20K21383 and  
458 20H05758). H. K. was supported by a research grant from the Japanese Ministry of  
459 Education, Culture, Sports, Science and Technology (18H03986) and a grant from CREST,  
460 Japan Science and Technology Agency (JPMJCR1753).

## 461 **Author contributions**

462 R.G. and P.-A.B. designed the study. P.-A.B., A.-Ş.A. and R.G. wrote the manuscript. P.-  
463 A.B., R.G., V.S.K, M.-C.C., C.D.V and A.-Ş.A. analysed and interpreted the data. K.I. and  
464 H.K. performed rhodopsin structural analyses. All authors commented on and approved  
465 the manuscript.

## 466 **Competing interests**

467 The authors declare no competing interests.

## 468 **References**

469 Andrei, Adrian-Ştefan, Michaela M. Salcher, Maliheh Mehrshad, Pavel Rychtecký, Petr  
470 Znachor, and Rohit Ghai. 2019. "Niche-Directed Evolution Modulates Genome  
471 Architecture in Freshwater Planctomycetes." *The ISME Journal* 13 (4): 1056–71.  
472 Aravind, L. 2000. "Guilt by Association: Contextual Information in Genome Analysis."  
473 *Genome Research* 10 (8): 1074–77.  
474 Aravind, L., L. M. Iyer, and V. Anantharaman. 2010. "Natural History of Sensor Domains in  
475 Bacterial Signaling Systems." In *Sensory Mechanisms in Bacteria: Molecular Aspects of*  
476 *Signal Recognition*, edited by Ray Dixon Stephen Spiro, 1–38. Caister Academic Press  
477 Norfolk, UK.  
478 Benjamini, Y., and Y. Hochberg. 1995. "Controlling the False Discovery Rate: A Practical  
479 and Powerful Approach to Multiple Testing." *Journal of the Royal Statistical Society*.  
480 <https://rss.onlinelibrary.wiley.com/doi/abs/10.1111/j.2517-6161.1995.tb02031.x>.  
481 Bhabak, Krishna P., and Govindasamy Mugesh. 2010. "Functional Mimics of Glutathione  
482 Peroxidase: Bioinspired Synthetic Antioxidants." *Accounts of Chemical Research* 43 (11):  
483 1408–19.  
484 Biller, Steven J., Paul M. Berube, Keven Dooley, Madeline Williams, Brandon M. Satinsky,  
485 Thomas Hackl, Shane L. Hogle, et al. 2018. "Marine Microbial Metagenomes Sampled  
486 across Space and Time." *Scientific Data* 5 (September): 180176.  
487 Bulzu, Paul-Adrian, Adrian-Ştefan Andrei, Michaela M. Salcher, Maliheh Mehrshad, Keiichi  
488 Inoue, Hideki Kandori, Oded Beja, Rohit Ghai, and Horia L. Banciu. 2019. "Casting Light

489 on Asgardarchaeota Metabolism in a Sunlit Microoxic Niche." *Nature Microbiology* 4 (7):  
490 1129–37.

491 Bushmanova, Elena, Dmitry Antipov, Alla Lapidus, and Andrey D. Prjibelski. 2019.  
492 "RnaSPAdes: A de Novo Transcriptome Assembler and Its Application to RNA-Seq Data."  
493 *GigaScience* 8 (9). <https://doi.org/10.1093/gigascience/giz100>.

494 Coleman, Gareth A., Adrián A. Davín, Tara Mahendrarajah, Anja Spang, Philip Hugenholtz,  
495 Gergely J. Szöllősi, and Tom A. Williams. 2020. "A Rooted Phylogeny Resolves Early  
496 Bacterial Evolution." *Cold Spring Harbor Laboratory*.  
497 <https://doi.org/10.1101/2020.07.15.205187>.

498 Eddy, Sean R. 2011. "Accelerated Profile HMM Searches." *PLoS Computational Biology* 7  
499 (10): e1002195.

500 El-Gebali, Sara, Jaina Mistry, Alex Bateman, Sean R. Eddy, Aurélien Luciani, Simon C.  
501 Potter, Matloob Qureshi, et al. 2019. "The Pfam Protein Families Database in 2019."  
502 *Nucleic Acids Research* 47 (D1): D427–32.

503 Ferguson, G. P., S. Töttemeyer, M. J. MacLean, and I. R. Booth. 1998. "Methylglyoxal  
504 Production in Bacteria: Suicide or Survival?" *Archives of Microbiology* 170 (4): 209–18.

505 Flores-Uribe, J., G. Hevroni, and R. Ghai. 2019. "Heliorhodopsins Are Absent in Diderm  
506 (Gram-negative) Bacteria: Some Thoughts and Possible Implications for Activity."  
507 *Environmental Microbiology Reports*.  
508 <https://onlinelibrary.wiley.com/doi/abs/10.1111/1758-2229.12730>.

509 Galperin, Michael Y., Kira S. Makarova, Yuri I. Wolf, and Eugene V. Koonin. 2015.  
510 "Expanded Microbial Genome Coverage and Improved Protein Family Annotation in the  
511 COG Database." *Nucleic Acids Research* 43 (Database issue): D261–9.

512 García-Domínguez, M., J. C. Reyes, and F. J. Florencio. 1999. "Glutamine Synthetase  
513 Inactivation by Protein-Protein Interaction." *Proceedings of the National Academy of  
514 Sciences of the United States of America* 96 (13): 7161–66.

515 Ghai, Rohit, Katherine D. McMahon, and Francisco Rodriguez-Valera. 2012. "Breaking a  
516 Paradigm: Cosmopolitan and Abundant Freshwater Actinobacteria Are Low GC."  
517 *Environmental Microbiology Reports* 4 (1): 29–35.

518 Haft, Daniel H., Jeremy D. Selengut, and Owen White. 2003. "The TIGRFAMs Database of  
519 Protein Families." *Nucleic Acids Research* 31 (1): 371–73.

520 Hashimoto, Masanori, Kota Katayama, Yuji Furutani, and Hideki Kandori. 2020. "Zinc  
521 Binding to Heliorhodopsin." *Journal of Physical Chemistry Letters* 11 (20): 8604–9.

522 Hauser, Maria, Martin Steinegger, and Johannes Söding. 2016. "MMseqs Software Suite  
523 for Fast and Deep Clustering and Searching of Large Protein Sequence Sets."  
524 *Bioinformatics* 32 (9): 1323–30.

525 Huynen, M., B. Snel, W. Lathe 3rd, and P. Bork. 2000. "Predicting Protein Function by  
526 Genomic Context: Quantitative Evaluation and Qualitative Inferences." *Genome Research*  
527 10 (8): 1204–10.

528 Hyatt, Doug, Gwo-Liang Chen, Philip F. Locascio, Miriam L. Land, Frank W. Larimer, and  
529 Loren J. Hauser. 2010. "Prodigal: Prokaryotic Gene Recognition and Translation Initiation  
530 Site Identification." *BMC Bioinformatics* 11 (March): 119.

531 Ikuta, Tatsuya, Wataru Shihoya, Masahiro Sugiura, Kazuho Yoshida, Masahito Watari,  
532 Takaya Tokano, Keitaro Yamashita, et al. 2020. "Structural Insights into the Mechanism of  
533 Rhodopsin Phosphodiesterase." *Nature Communications* 11 (1): 5605.

- 534 Im, Yang Ju, Amanda J. Davis, Imara Y. Perera, Eva Johannes, Nina S. Allen, and Wendy F.  
535 Boss. 2007. "The N-Terminal Membrane Occupation and Recognition Nexus Domain of  
536 Arabidopsis Phosphatidylinositol Phosphate Kinase 1 Regulates Enzyme Activity." *The*  
537 *Journal of Biological Chemistry* 282 (8): 5443-52.
- 538 Johnson, Norman L., Adrienne W. Kemp, and Samuel Kotz. 2005. *Univariate Discrete*  
539 *Distributions*. John Wiley & Sons.
- 540 Kajava, Andrey V. 2012. "Tandem Repeats in Proteins: From Sequence to Structure."  
541 *Journal of Structural Biology* 179 (3): 279-88.
- 542 Käll, Lukas, Anders Krogh, and Erik L. L. Sonnhammer. 2005. "An HMM Posterior Decoder  
543 for Sequence Feature Prediction That Includes Homology Information." *Bioinformatics* 21  
544 Suppl 1 (June): i251-7.
- 545 Kandori, Hideki. 2020. "Biophysics of Rhodopsins and Optogenetics." *Biophysical Reviews*  
546 12 (2): 355-61.
- 547 Kanehisa, Minoru, Yoko Sato, and Kanae Morishima. 2016. "BlastKOALA and  
548 GhostKOALA: KEGG Tools for Functional Characterization of Genome and Metagenome  
549 Sequences." *Journal of Molecular Biology* 428 (4): 726-31.
- 550 Kanno, Manabu, Hideyuki Tamaki, Yasuo Mitani, Nobutada Kimura, Satoshi Hanada, and  
551 Yoichi Kamagata. 2015. "PH-Induced Change in Cell Susceptibility to Butanol in a High  
552 Butanol-Tolerant Bacterium, *Enterococcus Faecalis* Strain CM4A." *Biotechnology for*  
553 *Biofuels* 8 (April): 69.
- 554 Katoh, Kazutaka, and Daron M. Standley. 2013. "MAFFT Multiple Sequence Alignment  
555 Software Version 7: Improvements in Performance and Usability." *Molecular Biology and*  
556 *Evolution* 30 (4): 772-80.
- 557 Kavagutti, Vinicius S., Adrian-Ştefan Andrei, Maliheh Mehrshad, Michaela M. Salcher, and  
558 Rohit Ghai. 2019. "Phage-Centric Ecological Interactions in Aquatic Ecosystems Revealed  
559 through Ultra-Deep Metagenomics." *Microbiome* 7 (1): 135.
- 560 Kelley, Lawrence A., Stefans Mezulis, Christopher M. Yates, Mark N. Wass, and Michael J.  
561 E. Sternberg. 2015. "The Phyre2 Web Portal for Protein Modeling, Prediction and  
562 Analysis." *Nature Protocols* 10 (6): 845-58.
- 563 Kim, Suhyun, Ilnam Kang, Ji-Hui Seo, and Jang-Cheon Cho. 2019. "Culturing the  
564 Ubiquitous Freshwater Actinobacterial Acl Lineage by Supplying a Biochemical 'helper'  
565 Catalase." *The ISME Journal* 13 (9): 2252-63.
- 566 Kovalev, K., D. Volkov, R. Astashkin, A. Alekseev, I. Gushchin, J. M. Haro-Moreno, I.  
567 Chizhov, et al. 2020. "High-Resolution Structural Insights into the Heliorhodopsin Family."  
568 *Proceedings of the National Academy of Sciences of the United States of America* 117 (8):  
569 4131-41.
- 570 Krishna, S. Sri, Indraneel Majumdar, and Nick V. Grishin. 2003. "Structural Classification of  
571 Zinc Fingers: Survey and Summary." *Nucleic Acids Research* 31 (2): 532-50.
- 572 Li, Dinghua, Ruibang Luo, Chi-Man Liu, Chi-Ming Leung, Hing-Fung Ting, Kunihiko  
573 Sadakane, Hiroshi Yamashita, and Tak-Wah Lam. 2016. "MEGAHIT v1.0: A Fast and  
574 Scalable Metagenome Assembler Driven by Advanced Methodologies and Community  
575 Practices." *Methods* 102 (June): 3-11.
- 576 Li, Weizhong, and Adam Godzik. 2006. "Cd-Hit: A Fast Program for Clustering and  
577 Comparing Large Sets of Protein or Nucleotide Sequences." *Bioinformatics* 22 (13): 1658-  
578 59.

- 579 Lillig, Christopher Horst, Carsten Berndt, and Arne Holmgren. 2008. "Glutaredoxin  
580 Systems." *Biochimica et Biophysica Acta* 1780 (11): 1304-17.
- 581 Ma, Hui, Ying Lou, Wen Hui Lin, and Hong Wei Xue. 2006. "MORN Motifs in Plant PIPKs  
582 Are Involved in the Regulation of Subcellular Localization and Phospholipid Binding." *Cell*  
583 *Research* 16 (5): 466-78.
- 584 Maclean, Michelle, Scott J. MacGregor, John G. Anderson, and Gerry Woolsey. 2009.  
585 "Inactivation of Bacterial Pathogens Following Exposure to Light from a 405-Nanometer  
586 Light-Emitting Diode Array." *Applied and Environmental Microbiology* 75 (7): 1932-37.
- 587 Maresca, Julia A., Jessica L. Keffer, Priscilla P. Hempel, Shawn W. Polson, Olga  
588 Shevchenko, Jaysheel Bhavsar, Deborah Powell, Kelsey J. Miller, Archana Singh, and  
589 Martin W. Hahn. 2019. "Light Modulates the Physiology of Nonphototrophic  
590 Actinobacteria." *Journal of Bacteriology* 201 (10). <https://doi.org/10.1128/JB.00740-18>.
- 591 Megrian, Daniela, Najwa Taib, Jerzy Witwinowski, Christophe Beloin, and Simonetta  
592 Gribaldo. 2020. "One or Two Membranes? Diderm Firmicutes Challenge the Gram-  
593 Positive/Gram-Negative Divide." *Molecular Microbiology* 113 (3): 659-71.
- 594 Mehrshad, Maliheh, Michaela M. Salcher, Yusuke Okazaki, Shin-Ichi Nakano, Karel Šimek,  
595 Adrian-Stefan Andrei, and Rohit Ghai. 2018. "Hidden in Plain Sight-Highly Abundant and  
596 Diverse Planktonic Freshwater Chloroflexi." *Microbiome* 6 (1): 176.
- 597 Mitchell, Alex L., Alexandre Almeida, Martin Beracochea, Miguel Boland, Josephine  
598 Burgin, Guy Cochrane, Michael R. Crusoe, et al. 2020. "MGnify: The Microbiome Analysis  
599 Resource in 2020." *Nucleic Acids Research* 48 (D1): D570-78.
- 600 Mitchell, Alex L., Teresa K. Attwood, Patricia C. Babbitt, Matthias Blum, Peer Bork, Alan  
601 Bridge, Shoshana D. Brown, et al. 2019. "InterPro in 2019: Improving Coverage,  
602 Classification and Access to Protein Sequence Annotations." *Nucleic Acids Research* 47  
603 (D1): D351-60.
- 604 Neuenschwander, Stefan M., Rohit Ghai, Jakob Pernthaler, and Michaela M. Salcher.  
605 2018. "Microdiversification in Genome-Streamlined Ubiquitous Freshwater  
606 Actinobacteria." *The ISME Journal* 12 (1): 185-98.
- 607 Oubrie, A., H. J. Rozeboom, K. H. Kalk, A. J. Olsthoorn, J. A. Duine, and B. W. Dijkstra.  
608 1999. "Structure and Mechanism of Soluble Quinoprotein Glucose Dehydrogenase." *The*  
609 *EMBO Journal* 18 (19): 5187-94.
- 610 Parks, Donovan H., Maria Chuvochina, Pierre-Alain Chaumeil, Christian Rinke, Aaron J.  
611 Mussig, and Philip Hugenholtz. 2020. "A Complete Domain-to-Species Taxonomy for  
612 Bacteria and Archaea." *Nature Biotechnology* 38 (9): 1079-86.
- 613 Pushkarev, Alina, Keiichi Inoue, Shirley Larom, José Flores-Uribe, Manish Singh, Masae  
614 Konno, Sahoko Tomida, et al. 2018. "A Distinct Abundant Group of Microbial Rhodopsins  
615 Discovered Using Functional Metagenomics." *Nature* 558 (7711): 595-99.
- 616 Rastogi, Rajesh P., Richa, Ashok Kumar, Madhu B. Tyagi, and Rajeshwar P. Sinha. 2010.  
617 "Molecular Mechanisms of Ultraviolet Radiation-Induced DNA Damage and Repair."  
618 *Journal of Nucleic Acids* 2010 (December): 592980.
- 619 Resto, Melissa, Jason Yaffe, and Barbara Gerratana. 2009. "An Ancestral Glutamine-  
620 Dependent NAD(+) Synthetase Revealed by Poor Kinetic Synergism." *Biochimica et*  
621 *Biophysica Acta* 1794 (11): 1648-53.
- 622 Rouhier, Nicolas, Jérémy Couturier, Michael K. Johnson, and Jean-Pierre Jacquot. 2010.  
623 "Glutaredoxins: Roles in Iron Homeostasis." *Trends in Biochemical Sciences* 35 (1): 43-52.



- 624 Saiki, Takashi, Yasuhiko Kobayashi, Kiyotaka Kawagoe, and Teruhiko Beppu. 1985.  
625 "Dictyoglomus Thermophilum Gen. Nov., Sp. Nov., a Chemoorganotrophic, Anaerobic,  
626 Thermophilic Bacterium." *International Journal of Systematic and Evolutionary*  
627 *Microbiology* 35 (3): 253-59.
- 628 Sajko, S., I. Grishkovskaya, J. Kostan, and M. Graewert. 2020. "Structures of Three MORN  
629 Repeat Proteins and a Re-Evaluation of the Proposed Lipid-Binding Properties of MORN  
630 Repeats." *BioRxiv*. <https://www.biorxiv.org/content/10.1101/826180v2.abstract>.
- 631 Salazar, Guillem, Lucas Paoli, Adriana Alberti, Jaime Huerta-Cepas, Hans-Joachim  
632 Ruscheweyh, Miguelangel Cuenca, Christopher M. Field, et al. 2019. "Gene Expression  
633 Changes and Community Turnover Differentially Shape the Global Ocean  
634 Metatranscriptome." *Cell* 179 (5): 1068-1083.e21.
- 635 Shibata, Mikihiro, Keiichi Inoue, Kento Ikeda, Masae Konno, Manish Singh, Chihiro  
636 Kataoka, Rei Abe-Yoshizumi, Hideki Kandori, and Takayuki Uchihashi. 2018. "Oligomeric  
637 States of Microbial Rhodopsins Determined by High-Speed Atomic Force Microscopy and  
638 Circular Dichroic Spectroscopy." *Scientific Reports* 8 (1): 8262.
- 639 Shihoya, Wataru, Keiichi Inoue, Manish Singh, Masae Konno, Shoko Hososhima, Keitaro  
640 Yamashita, Kento Ikeda, et al. 2019. "Crystal Structure of Heliorhodopsin." *Nature* 574  
641 (7776): 132-36.
- 642 Shmakov, Sergey A., Kira S. Makarova, Yuri I. Wolf, Konstantin V. Severinov, and Eugene V.  
643 Koonin. 2018. "Systematic Prediction of Genes Functionally Linked to CRISPR-Cas Systems  
644 by Gene Neighborhood Analysis." *Proceedings of the National Academy of Sciences of*  
645 *the United States of America* 115 (23): E5307-16.
- 646 Taib, Najwa, Daniela Megrian, Jerzy Witwinowski, Panagiotis Adam, Daniel Poppleton,  
647 Guillaume Borrel, Christophe Beloin, and Simonetta Gribaldo. 2020. "Genome-Wide  
648 Analysis of the Firmicutes Illuminates the Diderm/Monoderm Transition." *Nature Ecology*  
649 *& Evolution*, October. <https://doi.org/10.1038/s41559-020-01299-7>.
- 650 Takeshima, H., S. Komazaki, M. Nishi, M. Iino, and K. Kangawa. 2000. "Junctophilins: A  
651 Novel Family of Junctional Membrane Complex Proteins." *Molecular Cell* 6 (1): 11-22.
- 652 Tanaka, Tatsuki, Manish Singh, Wataru Shihoya, Keitaro Yamashita, Hideki Kandori, and  
653 Osamu Nureki. 2020. "Structural Basis for Unique Color Tuning Mechanism in  
654 Heliorhodopsin." *Biochemical and Biophysical Research Communications* 533 (3): 262-67.
- 655 Timmers, Peer H. A., Charlotte D. Vavourakis, Robbert Kleerebezem, Jaap S. Sinninghe  
656 Damsté, Gerard Muyzer, Alfons J. M. Stams, Dimity Y. Sorokin, and Caroline M. Plugge.  
657 2018. "Metabolism and Occurrence of Methanogenic and Sulfate-Reducing Syntrophic  
658 Acetate Oxidizing Communities in Haloalkaline Environments." *Frontiers in Microbiology* 9  
659 (December): 3039.
- 660 UniProt Consortium. 2019. "UniProt: A Worldwide Hub of Protein Knowledge." *Nucleic*  
661 *Acids Research* 47 (D1): D506-15.
- 662 Vavourakis, Charlotte D., Adrian-Stefan Andrei, Maliheh Mehrshad, Rohit Ghai, Dimity Y.  
663 Sorokin, and Gerard Muyzer. 2018. "A Metagenomics Roadmap to the Uncultured  
664 Genome Diversity in Hypersaline Soda Lake Sediments." *Microbiome* 6 (1): 168.
- 665 Vavourakis, Charlotte D., Maliheh Mehrshad, Cherel Balkema, Rutger van Hall, Adrian-  
666 Ștefan Andrei, Rohit Ghai, Dimity Y. Sorokin, and Gerard Muyzer. 2019. "Metagenomes  
667 and Metatranscriptomes Shed New Light on the Microbial-Mediated Sulfur Cycle in a  
668 Siberian Soda Lake." *BMC Biology* 17 (1): 69.

669 Yatsunami, Rie, Ai Ando, Ying Yang, Shinichi Takaichi, Masahiro Kohno, Yuriko  
670 Matsumura, Hiroshi Ikeda, et al. 2014. "Identification of Carotenoids from the Extremely  
671 Halophilic Archaeon *Haloarcula Japonica*." *Frontiers in Microbiology* 5 (March): 100.  
672 Zhao, Shanrong, Ying Zhang, William Gordon, Jie Quan, Hualin Xi, Sarah Du, David von  
673 Schack, and Baohong Zhang. 2015. "Comparison of Stranded and Non-Stranded RNA-  
674 Seq Transcriptome Profiling and Investigation of Gene Overlap." *BMC Genomics* 16  
675 (September): 675.  
676 Zimmermann, Lukas, Andrew Stephens, Seung-Zin Nam, David Rau, Jonas Kübler, Marko  
677 Lozajic, Felix Gabler, Johannes Söding, Andrei N. Lupas, and Vikram Alva. 2018. "A  
678 Completely Reimplemented MPI Bioinformatics Toolkit with a New HHpred Server at Its  
679 Core." *Journal of Molecular Biology* 430 (15): 2237-43.

1 **Supplementary Information**

2 **Heliorhodopsin evolution is driven by photosensory promiscuity in monoderms**

3 Paul-Adrian Bulzu<sup>1</sup>, Vinicius Silva Kavagutti<sup>1,2</sup>, Maria-Cecilia Chiriac<sup>1</sup>, Charlotte  
4 D. Vavourakis<sup>3</sup>, Keiichi Inoue<sup>4</sup>, Hideki Kandori<sup>5,6</sup>, Adrian-Stefan Andrei<sup>7</sup>, Rohit  
5 Ghai<sup>1\*</sup>

6 <sup>1</sup>Department of Aquatic Microbial Ecology, Institute of Hydrobiology, Biology Centre of  
7 the Academy of Sciences of the Czech Republic, České Budějovice, Czech Republic.

8 <sup>2</sup>Department of Ecosystem Biology, Faculty of Science, University of South Bohemia,  
9 Branišovská 1760, České Budějovice, Czech Republic.

10 <sup>3</sup>EUTOPS, Research Institute for Biomedical Aging Research, University of Innsbruck,  
11 Austria.

12 <sup>4</sup>The Institute for Solid State Physics, The University of Tokyo, Kashiwa, Japan.

13 <sup>5</sup>Department of Life Science and Applied Chemistry, Nagoya Institute of Technology,  
14 Showa, Nagoya 466-8555, Japan.

15 <sup>6</sup>OptoBioTechnology Research Center, Nagoya Institute of Technology, Showa, Nagoya  
16 466-8555, Japan

17 <sup>7</sup>Limnological Station, Department of Plant and Microbial Biology, University of Zurich,  
18 Kilchberg, Switzerland.

19 \*Corresponding author: Rohit Ghai

20 Department of Aquatic Microbial Ecology, Institute of Hydrobiology, Biology Centre of the  
21 Academy

22 of Sciences of the Czech Republic, Na Sádkách 7, 370 05, České Budějovice, Czech  
23 Republic.

24 Phone: +420 387 775 881

25 Fax: +420 385 310 248

26 E-mail: [ghai.rohit@gmail.com](mailto:ghai.rohit@gmail.com)

27 We examined the distribution and co-occurrence of HeRs and type-1 rhodopsins  
28 ([Supplementary Tables S4-S7](#)) in the GTDB database (release 89), as it has been previously  
29 suggested that these proteins tend to coexist within the same organisms (Kovalev et al.  
30 2020). From all 24,706 scanned genomes we identified and retrieved 1,455 *bona fide*  
31 type-1 rhodopsin-containing genomes from which 69 (4.74 %) proved to also harbour  
32 HeRs. Since 15.33 % from all identified HeRs (n = 450) co-occur with type-1 rhodopsins we  
33 consider it as being more an exception than a norm and find no data to sustain a  
34 physiological dependency between these two rhodopsin families.

### 35 **MORN-protein domain fusions**

36 The bacteria encoding MORN-HeRs were previously predicted to be strict anaerobes  
37 (Timmers et al. 2018). Although mostly recovered from sediments, these MAGs also  
38 encode other proteins directly or indirectly associated with the presence of light (i.e.  
39 bacteriophytochrome COG4251, DNA repair photolyase COG1533,  
40 Deoxyribodipyrimidine photolyase COG0415). Therefore, the co-occurrence of strict  
41 anaerobiosis and light-dependent components indicates the top sediment layer as their  
42 likely habitat. The available 3D structure of MORN-repeats shows a single repeat to consist  
43 of short beta-pleated regions folded back upon themselves, creating a flat surface area  
44 that expands when the repeats are present in multiple tandem copies (Wilson et al., 2002).  
45 The presence of periplasmic proteins with MORN-Big\_2 or MORN-Big2-PASTA domains  
46 may indicate the extracellular MORN repeats as adaptors between typical sensor domains  
47 (i.e. PASTA/Big\_2) and the transducer protein kinases acting in the cytoplasm  
48 ([Supplementary Figure 3](#)). However, as the MORN-repeats that are fused to HeRs in these  
49 organisms are intracellular, they could only interact with MORN-repeats on the  
50 cytoplasmic side. In one such case, intracellular MORN-repeats were fused to ATPase  
51 component of an ABC-type efflux pump (likely involved in drug resistance or Cu<sup>2+</sup>/Na<sup>2+</sup>  
52 ion efflux). The other candidate found was a PknB protein kinase-FHA-MORN repeat fusion  
53 that was predicted to be in an atypical membrane orientation. In such proteins,  
54 dimerization domains (e.g. PASTA) are extracellular ([Supplementary Figure 3C](#)) while  
55 cytoplasmic protein kinase domains function as part of signal transduction pathways in a  
56 wide range of gram-positive bacteria (Kang et al. 2005). The dimerization of PknB is  
57 essential for autophosphorylation and activation of the kinases through an allosteric  
58 mechanism (Lombana et al. 2010). The predicted reverse orientation (if correct) of this  
59 protein renders MORN-mediated interactions with HeR unlikely in these organisms.  
60 However, the presence of MORN-repeats in PknB type proteins for which dimerization is  
61 essential for function (most likely via MORN-repeats) strengthens the possibility that the  
62 MORN-repeats aid in MORN-HeR dimerization as well.

### 63 **Various Cysteine-rich motif-containing heliorhodopsins**

64 Another extension found in four sequences (N-terminal variant 2 or ntv2 in [Supplementary](#)  
65 [Table S8](#)) with many more cysteines (n = 10) that did not give any significant hits to known  
66 proteins was also identified. The presence of multiple cysteine residues and a conserved  
67 tryptophan residue is reminiscent of RINGv finger domains that coordinate two metals.  
68 However, RING finger domains also have a highly conserved histidine residue that was not  
69 detected. Indeed, we also found at least two instances in freshwater Actinobacteria (*Ca.*  
70 *Planktophila*) where a RINGv domain-containing protein is located right upstream of the  
71 heliorhodopsin gene and in the same orientation (see [Figure 3](#)).

72 A third variant (ntv3) with seven cysteines was found (in Thermoplasmatales and in  
73 Euryarchaeota) but without conserved histidines or tryptophan. However, it shows broad  
74 similarity with ntv3 in presence of conserved prolines and arginines before the cysteine  
75 motifs. Apart from the n-terminal extensions motifs, at least three sequences of the  
76 intracellular loop (ICL3), were also found to be rich in cysteines (n = 8) which also  
77 presented a conserved tryptophan similar to ntv2 described above (intracellular loop 3  
78 variant 1, icl3v1).

79 Thus, at least 17 sequences presented cysteine-rich motifs either at the N-terminus (ntv1,  
80 ntv2 and ntv3) or in the intracellular loop (icl3v1) at the cytoplasmic side of  
81 heliorhodopsins suggesting the possibility that these might be transducers of the  
82 conformational change in heliorhodopsins upon light excitation. The conserved cysteines  
83 in these proteins could bind either iron or zinc and are likely redox-active. While we did  
84 find many other types of N-terminal extensions, we were unable to find any significant hits  
85 to these even by sensitive sequence searches (Supplementary Table S8).

### 86 **Sources of retinal for HeR function**

87 We also found several NAD-dependent short-chain dehydrogenases that might encode  
88 for retinol dehydrogenases in the vicinity of HeRs (adh\_short in [Figure 3, Supplementary](#)  
89 [Table S9](#)). It has been mentioned before that as HeRs are able to efficiently capture retinal  
90 from exogenous sources and that HeR-encoding microbes do not have a retinal  
91 biosynthesis pathway (Shihoya et al. 2019).

92 *De novo* retinal biosynthesis requires five genes that if supplied in-trans to a non-retinal  
93 producing microbe may result in functional rhodopsins (Sabehehi et al. 2005). The final step  
94 of the *de novo* pathway uses a beta-carotene monooxygenase that converts beta-carotene  
95 to retinal. However, retinal may also be converted from retinol by the action of retinol  
96 dehydrogenases. We used the curated GTDB database to further probe the co-  
97 occurrence of HeR and type-1 rhodopsins along with genes for retinal biosynthesis. Of the  
98 total of 381 genomes that encoded only HeR, we find that only a single genome encoded  
99 all genes necessary for the *de novo* production of retinal, but 213 (55%) also encoded the  
100 beta-carotene monooxygenase and 241 genomes (63%) encoded at least one retinol  
101 dehydrogenase (Supplementary Table S10). Considering genomes that encoded only  
102 type-1 rhodopsins (n = 1,386), 596 (43%) encoded the complete pathway for retinal  
103 biosynthesis and additionally 995 (71%) also encoded at least one retinol dehydrogenase.  
104 It appears that microbes encoding only HeR mostly lack the complete pathway for *de novo*  
105 retinal biosynthesis and that apart from exogenous capture of retinal, conversion from  
106 beta-carotene (via beta-carotene monooxygenase) or from retinol (via retinol  
107 dehydrogenases) may be at work.

### 108 **HeR genomic context**

109 We performed gene context analysis of HeRs by combining the maximum-likelihood  
110 phylogenetic tree generated for representative HeR sequences (n = 872) with HeR gene  
111 neighbourhood information (Supp. Figure 4; iTOL:  
112 <https://itol.embl.de/tree/14723125092152021608050562>). The resulting tree places most  
113 HeR sequences (n = 835) within 19 conspicuous phylogenetic clusters which we further  
114 denominate as C1-C19 (see Supp. Figure 15). Among them, Actinobacteriota-encoded  
115 HeRs are by far the most numerous (n = 533) accounting for eight well-defined clusters

116 (i.e. C1-7 and C11) and a small sub-cluster within Patescibacteria (CPR)-dominated C17.  
117 Regarding Actinobacteriota, C1 and C3 are represented by order Nanopelagicales, C2  
118 includes chiefly members of Microtrichales (class Acidimicrobiia), C4 comprises  
119 Actinomycetales HeRs and C5 includes classes Coriobacteriia and Thermoleophilia.  
120 Notably, C5 brings together HeRs recovered mainly from lesser studied sediment habitats  
121 including nine Chloroflexota (class Dehalococcoidia) sequences. Predominantly marine  
122 C6 includes Acidimicrobiia HeRs from order Microtrichales and other poorly classified  
123 representatives from within this class while C7 has both marine and freshwater  
124 Microtrichales together with Propionibacteriales genus *Nocardioides*.

125 Cluster C11 stands out in this analysis due to the high level of evolutionary conservation of  
126 both HeRs and their neighbouring genes, bringing together exclusively members of  
127 marine Actinobacteria from order *Ca. Actinomarinales* (TMED189). Importantly, in C11 we  
128 notice that synteny is only conserved among genes sharing the same orientation as HeR  
129 while gene “gains” and/or “losses” occur only in the opposite orientation. Despite very  
130 high phylogenetic relatedness within C11 and therefore the unsurprisingly similar gene  
131 context amongst its members, the differences between (+) and (-) strand feature  
132 conservation (relative to HeR orientation) indicate a potentially relevant transcriptional unit  
133 comprised of genes: *afuA* - iron(III) transport system substrate-binding protein (K02012),  
134 *afuB* - iron(III) transport system permease protein (K02011), *afuC* - iron(III) transport system  
135 ATP-binding protein (K02010), *HeR* - Heliorhodopsin (PF18761), an 11-subunit respiratory  
136 complex I operon (*nuoA, B, C, D, H, I, J, K, L, M, N*), *NDUFAF7* - NADH dehydrogenase  
137 [ubiquinone] 1 alpha subcomplex assembly factor 7 (K18164/PF02636), *htpX* - heat shock  
138 protein (K03799), *pspE* - phage shock protein E (K03972) containing a *Rhodanese*  
139 (PF00581) domain and *adenosine\_kinase* (cd01168) (Note: full-length annotated contigs  
140 deposited in Figshare). In summary, HeRs from C11 are always preceded by genes  
141 encoding a complete ABC-type ferric iron uptake system and followed by an operon  
142 encoding a 11-subunit, “ancestral”-type (Moparthi and Hägerhäll 2011) respiratory  
143 complex I and by accessory components required for correct assembly and function of this  
144 complex (*NDUFAF7, htpX, pspE*) (Zurita Rendón et al. 2014; Pagani and Galante 1983;  
145 Alexander and Volini 1987; Sakoh, Ito, and Akiyama 2005). The last conserved gene  
146 encodes a *pfkB* family adenosine kinase (cd01168), a key purine salvage enzyme that  
147 phosphorylates adenosine to generate adenosine monophosphate (AMP) (Long, Escuyer,  
148 and Parker 2003).

149 The presence of HeRs within the same transcriptional unit as above mentioned energy  
150 metabolism components could indicate them as modulators or even light-induced sensory  
151 “switches” of such processes, a mechanism perhaps similar to cryptochrome-driven  
152 metabolic synchronization with substrate availability described in other Actinobacteria  
153 (Maresca et al. 2019). Notably, beside the 11-subunit complex I, that lacks the NADH  
154 dehydrogenase module (subunits *nuoE, nuoF, nuoG*) (Moparthi and Hägerhäll 2011), *Ca.*  
155 *Actinomarina* (TMED189) genomes also encode the full-sized 14-subunit variant of  
156 respiratory complex I in close proximity to the first (for example in GCA-902516125.1).  
157 Curiously, the association of HeRs with complex I genes is reminiscent of that between the  
158 transmembrane, sensory, EAL-domain containing protein seen in *Bacillus cereus* located  
159 upstream of a similar 11-subunit complex I operon (Moparthi and Hägerhäll 2011).

160 The last cluster featuring a significant number of Actinobacteria HeRs ( $n = 12$ ) is C17. In  
161 this CPR-dominated cluster, Actinobacteria HeRs form a well-defined group sharing a  
162 common ancestor with a small CPR sub-cluster. While gene context appears conserved  
163 within these Actinobacteria, this does not apply to the putative “sister” CPR sub-cluster.

164 Clusters C8-C10 share a common ancestor with C11 and include HeRs encoded largely in  
165 strict or facultative anaerobic prokaryotes recovered from sediments (including activated  
166 sludge). Notably, the phylogenetic tree (iTOL link above) shows two Asgardarchaeota  
167 (class Heimdallarchaeia) HeRs branching with very high support (SH-test/UFBot =  
168 97.2/98) as a sister clade to all C8-C10 members, after the split with the common ancestor  
169 shared with C11. Despite the high support for the Asgardarchaeota HeR split, defining a  
170 credible cluster will require including additional sequences once more genomes become  
171 available. The basal, C10 cluster, is comprised of Archaea-derived HeRs from phyla  
172 Crenarchaeota (class Bathyarchaeia) and Euryarchaeota (class Methanobacteria). Clusters  
173 C8 and mainly C9 include the MORN-HeR encoding Firmicutes as well as a few  
174 Chloroflexota (class Anaerolineae) HeRs.

175 C12-C16 form a separate super-cluster showing moderate-to-low support for internal  
176 branching patterns and include mostly, although not exclusively, anaerobic Archaea (C12  
177 and C14, with the notable exception of aerobic Halobacterota within C12) and anaerobic  
178 Chloroflexota (classes Anaerolineae - C13, C15 and Dehalococcoidia - C16). Notably, C16  
179 includes one Thermoplasmata HeR (encoded in contig SRR5506739-C331) with a zinc-  
180 finger extension (Znf-HeR) at the N-terminus. C18 is the most basal cluster with confidently  
181 assigned taxonomy. It includes exclusively aerobic Chloroflexota members of the  
182 Ellin6529 lineage.

183 Although no consensus taxonomy could be determined for members of C19 - the first  
184 branching group after the split with proteorhodopsins, the abundance of “eukaryotic  
185 signature proteins” (ESP) (e.g. Arf, Roc, Rab, etc.) points towards either a eukaryotic origin  
186 or unidentified, ESP-rich archaea (Hartman and Fedorov 2002; Dong, Wen, and Tian  
187 2007).

188 An extended phylogenetic tree of HeRs, including additional dereplicated sequences  
189 identified and retrieved from UniProtKB and GTDB, is available in FigShare (see Supp.  
190 Methods - Phylogenetic tree of HeRs).

## 191 **Supplementary Methods**

192 **Re-assembling of HeR-encoding Spirochaeta.** The unexpected detection of HeR in a  
193 previously published *Spirochaeta* (diderm organism) genome prompted further  
194 investigation. The original Illumina short-read dataset SRX2623364 was downloaded from  
195 NCBI SRA (Sequence Read Archive) and preprocessed by using a combination of tools  
196 provided by the BMap project (<https://sourceforge.net/projects/bbmap/>). This involved  
197 removing poor-quality reads with `bbduk.sh` (`qtrim = rl`, `trimq = 18`), identifying phiX and p-  
198 Fosil2 control reads ( $k = 21$ ) and removing Illumina sequencing adapters ( $k = 21$ ). Further,  
199 *de novo* assembly of preprocessed paired-end reads was done by Megahit v1.2.9 (D. Li et  
200 al. 2016) with k-mer list: 29, 39, 49, 59, 69, 79, 89, 99, 109, 119, 127, and with default  
201 parameters. A total of 886 contigs with an average length of 4.98 kbp were produced.

202 Protein-coding genes were predicted by Prodigal (Hyatt et al. 2010) and taxonomically  
203 classified by scanning with MMSeqs2 against the GTDB database. A *Spirochaeta* contig  
204 (length = 304,032 bp) was identified and scanned for the presence of HeR against the  
205 PFAM database. Both taxonomy (*Spirochaeta*) and HeR presence were consistent with  
206 previously published results.

207 **Phylogenetic tree of HeRs.** An extensive collection of predicted HeR amino acid  
208 sequences (n = 4,108) was generated from: 1) all HeR sequences available in UniProtKB (n  
209 = 502), 2) HeR identified within dereplicated contigs (using cd-hit-est -c 0.95 -aS 0.95)  
210 assembled from publicly available metagenomes and metatranscriptomes (n = 3,145), 3)  
211 HeR identified within dereplicated high-quality MAGs included in the GTDB database (n =  
212 455) and 4) HeR assembled from the strand-specific metatranscriptomic dataset  
213 generated in this study (n = 6). This collection was simplified by keeping only  
214 representative sequences (n = 1,669) chosen following clustering with MMSeqs2  
215 (Steinegger and Söding 2017) at 90% sequence identity and 90% coverage (mode: easy-  
216 cluster; -c 0.90; --min-seq-id 0.90). Representative HeR sequences were aligned together  
217 with 30 selected proteorhodopsins serving as outgroup by using PASTA (Mirarab et al.  
218 2015) (resulting alignment with 1,699 sequences, 2,486 columns, 2,264 distinct patterns,  
219 1,091 parsimony-informative sites, 698 singleton sites, 697 constant sites). A Maximum  
220 Likelihood (ML) phylogenetic tree was constructed with IQ-TREE2 (Minh et al. 2020) (1,000  
221 iterations for ultrafast bootstrapping (Hoang et al. 2018) and SH testing, respectively; best  
222 model chosen by ModelFinder (Kalyaanamoorthy et al. 2017): LG+G4; additional  
223 parameters recommended for short sequence alignments -nstop 500 -pers 0.2). The  
224 generated tree was annotated to include labels containing: HeR-encoding contig name,  
225 habitat of origin and consensus GTDB taxonomic classification (if available). Data including  
226 alignment and the annotated phylogenetic tree are deposited in FigShare  
227 (<https://figshare.com/s/7bb42426f2ad5e891fec>).

228 **Phylogenetic tree of HeRs with gene context.** A simplified depiction of HeR genomic  
229 context across representative taxonomic groups harbouring such genes was constructed  
230 by merging HeR phylogenetic information with available HeR gene neighbourhood data  
231 (Supplementary Figure 4). For this purpose, we established a collection of representative,  
232 dereplicated HeR-encoding contigs (n = 872) of at least 5 kb and with clear consensus  
233 taxonomy from two sources: 1) HeR-encoding contigs assembled from publicly available  
234 metagenomes and metatranscriptomes (n = 3,145) and 2) HeR contigs assembled from  
235 the strand-specific metatranscriptomic dataset generated in this study (n = 6).  
236 Dereplication of contigs was previously achieved using cd-hit-est (W. Li and Godzik 2006)  
237 with identity cutoffs of 95% and coverage of 95% (-c 0.95 -aS 0.95). **Phylogenetic tree**  
238 **building:** Curated HeR sequences recovered from selected contigs were aligned together  
239 with 30 proteorhodopsins serving as outgroup by using PASTA (Mirarab et al. 2015)  
240 (resulting alignment with 902 sequences with 957 columns, 895 distinct patterns, 550  
241 parsimony-informative sites, 198 singleton sites, 209 constant sites). A Maximum  
242 Likelihood (ML) phylogenetic tree was constructed with IQ-TREE2 (Minh et al. 2020) (1,000  
243 iterations for ultrafast bootstrapping (Hoang et al. 2018) and SH testing, respectively; best  
244 model chosen by ModelFinder (Kalyaanamoorthy et al. 2017): LG+I+G4; additional  
245 parameters recommended for short sequence alignments -nstop 500 -pers 0.2).



246 **Reconstruction of HeR gene neighborhoods:** Coding sequences were predicted *de*  
247 *novo* using Prodigal (Hyatt et al. 2010) in metagenomic (-p meta) mode. Protein domains  
248 were annotated by scanning predicted coding sequences against the PFAM (Protein  
249 Families) database using the publicly available perl script pfam\_scan.pl. Predicted protein  
250 sequences from all contigs were clustered together using the MMSeqs2 easy-cluster  
251 workflow with 50% identity and 80% coverage cutoffs (--min-seq-id 0.5 -c 0.8 -e 1e-3 --  
252 cluster-reassign) and a minimum of 2 sequences per cluster. Clusters were sorted  
253 according to their size (i.e. number of sequences) and colour codes were assigned to the  
254 top largest 63. All clusters containing HeRs were assigned matching colours. HeR gene  
255 neighbourhood data was combined with the reconstructed HeR phylogenetic tree in iTOL  
256 (Letunic and Bork 2016) (<https://itol.embl.de/>). To facilitate visual interpretation, a number  
257 of adjustments and rules were applied: 1) all contigs were oriented according to the sense  
258 (+) of encoded HeRs, 2) contigs were centered on HeR genes with a maximum of 10  
259 neighbouring genes depicted up- and downstream, 3) information regarding gene  
260 lengths was not included, all of them being shown as equally sized rectangles, 4)  
261 homologous genes (i.e. members of the same MMSeqs2 defined cluster) share matching  
262 colours within each phylogenetically defined cluster, 5) all HeRs are coloured the same  
263 across all phylogenetic clusters, 6) grey rectangles indicate genes with few homologues  
264 and/or singletons, 7) taxonomy, habitat information and phylogenetic clusters are colour  
265 coded on independent strips.

266 **MORN-HeR phylogenomic tree.** A maximum-likelihood (ML) phylogenomic tree was  
267 constructed for Firmicutes MAGs encoding MORN-HeR protein domain fusions along with  
268 other representatives of this phylum that assumably lack such genes. The established  
269 collection of (n = 68) MAGs and reference genomes (Supplementary Table S15) was  
270 scanned by hmmsearch against a previously published list of (n = 120) conserved protein  
271 marker HMMs (Parks et al. 2018). Four divergent markers (TIGR00442, TIGR00539,  
272 TIGR00643, TIGR00717) were identified by scanning with CD-search (e-value < 1e-2) and  
273 removed. Curated amino acid sequences for the selected 116 phylogenetic markers were  
274 aligned with PRANK (Löytynoja 2014) and resulting alignments were trimmed by BMGE  
275 (parameters: -t AA -g 0.5 -b 3 -m BLOSUM30) (Criscuolo and Gribaldo 2010). Individually  
276 trimmed alignments were concatenated resulting in a block of 68 sequences with 40,714  
277 columns, 36,088 distinct patterns, 28,978 parsimony informative sites, 3,366 singleton  
278 sites and 8,370 constant sites. The concatenated alignment was used with IQ-TREE  
279 (v.1.6.12) to construct the ML phylogenomic tree (parameters: 1,000 iterations of ultrafast  
280 bootstrapping (Hoang et al. 2018) and SH testing (Minh et al. 2020), respectively; best  
281 model (LG+F+R5) chosen by ModelFinder (Kalyaanamoorthy et al. 2017).

282 **Multiple sequence alignment (MSA) of MORN-HeR proteins.** Predicted amino acid  
283 sequences containing full-length MORN-MORN-MORN-HeR protein domain fusions (n =  
284 36) were retrieved from Firmicutes MAGs (n = 35) previously used to construct the  
285 phylogenomic tree presented in Supplementary Figure 1. All sequences were aligned  
286 together using the PSI-Coffee alignment method (Chang et al. 2012) provided by the T-  
287 Coffee online server (<http://tcoffee.crg.cat>) with default parameters. The resulting MSA is  
288 presented with annotations in Supplementary Figure 2 while the original alignment file  
289 generated by PSI-Coffee is available in FigShare  
290 (<https://figshare.com/s/7bb42426f2ad5e891fec>).

## 291 **Supplementary References**

- 292 Alexander, K., and M. Volini. 1987. "Properties of an Escherichia Coli Rhodanese." *The*  
293 *Journal of Biological Chemistry* 262 (14): 6595–6604.
- 294 Chang, Jia-Ming, Paolo Di Tommaso, Jean-François Taly, and Cedric Notredame. 2012.  
295 "Accurate Multiple Sequence Alignment of Transmembrane Proteins with PSI-  
296 Coffee." *BMC Bioinformatics* 13 Suppl 4 (March): S1.
- 297 Criscuolo, Alexis, and Simonetta Gribaldo. 2010. "BMGE (Block Mapping and Gathering with  
298 Entropy): A New Software for Selection of Phylogenetic Informative Regions from  
299 Multiple Sequence Alignments." *BMC Evolutionary Biology* 10 (July): 210.
- 300 Dong, Jiu-Hong, Jian-Fan Wen, and Hai-Feng Tian. 2007. "Homologs of Eukaryotic Ras  
301 Superfamily Proteins in Prokaryotes and Their Novel Phylogenetic Correlation with  
302 Their Eukaryotic Analogs." *Gene* 396 (1): 116–24.
- 303 Hartman, Hyman, and Alexei Fedorov. 2002. "The Origin of the Eukaryotic Cell: A Genomic  
304 Investigation." *Proceedings of the National Academy of Sciences of the United States*  
305 *of America* 99 (3): 1420–25.
- 306 Hoang, Diep Thi, Olga Chernomor, Arndt von Haeseler, Bui Quang Minh, and Le Sy Vinh.  
307 2018. "UFBoot2: Improving the Ultrafast Bootstrap Approximation." *Molecular*  
308 *Biology and Evolution* 35 (2): 518–22.
- 309 Hyatt, Doug, Gwo-Liang Chen, Philip F. Locascio, Miriam L. Land, Frank W. Larimer, and Loren  
310 J. Hauser. 2010. "Prodigal: Prokaryotic Gene Recognition and Translation Initiation  
311 Site Identification." *BMC Bioinformatics* 11 (March): 119.
- 312 Kalyaanamoorthy, Subha, Bui Quang Minh, Thomas K. F. Wong, Arndt von Haeseler, and Lars  
313 S. Jermiin. 2017. "ModelFinder: Fast Model Selection for Accurate Phylogenetic  
314 Estimates." *Nature Methods* 14 (6): 587–89.
- 315 Kang, Choong-Min, Derek W. Abbott, Sang Tae Park, Christopher C. Dascher, Lewis C.  
316 Cantley, and Robert N. Husson. 2005. "The Mycobacterium Tuberculosis  
317 Serine/Threonine Kinases PknA and PknB: Substrate Identification and Regulation of  
318 Cell Shape." *Genes & Development* 19 (14): 1692–1704.
- 319 Kovalev, K., D. Volkov, R. Astashkin, A. Alekseev, I. Gushchin, J. M. Haro-Moreno, I. Chizhov,  
320 et al. 2020. "High-Resolution Structural Insights into the Heliorhodopsin Family."  
321 *Proceedings of the National Academy of Sciences of the United States of America* 117  
322 (8): 4131–41.
- 323 Letunic, Ivica, and Peer Bork. 2016. "Interactive Tree of Life (ITOL) v3: An Online Tool for the  
324 Display and Annotation of Phylogenetic and Other Trees." *Nucleic Acids Research* 44  
325 (W1): W242-5.
- 326 Li, Dinghua, Ruibang Luo, Chi-Man Liu, Chi-Ming Leung, Hing-Fung Ting, Kunihiro Sadakane,  
327 Hiroshi Yamashita, and Tak-Wah Lam. 2016. "MEGAHIT v1.0: A Fast and Scalable  
328 Metagenome Assembler Driven by Advanced Methodologies and Community  
329 Practices." *Methods* 102 (June): 3–11.
- 330 Li, Weizhong, and Adam Godzik. 2006. "Cd-Hit: A Fast Program for Clustering and Comparing  
331 Large Sets of Protein or Nucleotide Sequences." *Bioinformatics* 22 (13): 1658–59.
- 332 Lombana, T. Noelle, Nathaniel Echols, Matthew C. Good, Nathan D. Thomsen, Ho-Leung Ng,  
333 Andrew E. Greenstein, Arnold M. Falick, David S. King, and Tom Alber. 2010.  
334 "Allosteric Activation Mechanism of the Mycobacterium Tuberculosis Receptor  
335 Ser/Thr Protein Kinase, PknB." *Structure* 18 (12): 1667–77.

- 336 Long, Mary C., Vincent Escuyer, and William B. Parker. 2003. "Identification and  
337 Characterization of a Unique Adenosine Kinase from Mycobacterium Tuberculosis."  
338 *Journal of Bacteriology* 185 (22): 6548–55.
- 339 Löytynoja, Ari. 2014. "Phylogeny-Aware Alignment with PRANK." *Methods in Molecular*  
340 *Biology* 1079: 155–70.
- 341 Maresca, Julia A., Jessica L. Keffer, Priscilla P. Hempel, Shawn W. Polson, Olga Shevchenko,  
342 Jaysheel Bhavsar, Deborah Powell, Kelsey J. Miller, Archana Singh, and Martin W.  
343 Hahn. 2019. "Light Modulates the Physiology of Nonphototrophic Actinobacteria."  
344 *Journal of Bacteriology* 201 (10). <https://doi.org/10.1128/JB.00740-18>.
- 345 Minh, Bui Quang, Heiko A. Schmidt, Olga Chernomor, Dominik Schrempf, Michael D.  
346 Woodhams, Arndt von Haeseler, and Robert Lanfear. 2020. "IQ-TREE 2: New Models  
347 and Efficient Methods for Phylogenetic Inference in the Genomic Era." *Molecular*  
348 *Biology and Evolution* 37 (5): 1530–34.
- 349 Mirarab, Siavash, Nam Nguyen, Sheng Guo, Li-San Wang, Junhyong Kim, and Tandy Warnow.  
350 2015. "PASTA: Ultra-Large Multiple Sequence Alignment for Nucleotide and Amino-  
351 Acid Sequences." *Journal of Computational Biology: A Journal of Computational*  
352 *Molecular Cell Biology* 22 (5): 377–86.
- 353 Moparthi, Vamsi K., and Cecilia Hägerhäll. 2011. "The Evolution of Respiratory Chain  
354 Complex I from a Smaller Last Common Ancestor Consisting of 11 Protein Subunits."  
355 *Journal of Molecular Evolution* 72 (5–6): 484–97.
- 356 Pagani, S., and Y. M. Galante. 1983. "Interaction of Rhodanese with Mitochondrial NADH  
357 Dehydrogenase." *Biochimica et Biophysica Acta* 742 (2): 278–84.
- 358 Parks, Donovan H., Maria Chuvochina, David W. Waite, Christian Rinke, Adam Skarshewski,  
359 Pierre-Alain Chaumeil, and Philip Hugenholtz. 2018. "A Standardized Bacterial  
360 Taxonomy Based on Genome Phylogeny Substantially Revises the Tree of Life."  
361 *Nature Biotechnology* 36 (10): 996–1004.
- 362 Sabehi, Gazalah, Alexander Loy, Kwang-Hwan Jung, Ranga Partha, John L. Spudich, Tal  
363 Isaacson, Joseph Hirschberg, Michael Wagner, and Oded Béjà. 2005. "New Insights  
364 into Metabolic Properties of Marine Bacteria Encoding Proteorhodopsins." *PLoS*  
365 *Biology*. <https://doi.org/10.1371/journal.pbio.0030273>.
- 366 Sakoh, Machiko, Koreaki Ito, and Yoshinori Akiyama. 2005. "Proteolytic Activity of HtpX, a  
367 Membrane-Bound and Stress-Controlled Protease from Escherichia Coli." *The Journal*  
368 *of Biological Chemistry* 280 (39): 33305–10.
- 369 Shihoya, Wataru, Keiichi Inoue, Manish Singh, Masae Konno, Shoko Hososhima, Keitaro  
370 Yamashita, Kento Ikeda, et al. 2019. "Crystal Structure of Heliorhodopsin." *Nature*  
371 574 (7776): 132–36.
- 372 Steinegger, Martin, and Johannes Söding. 2017. "MMseqs2 Enables Sensitive Protein  
373 Sequence Searching for the Analysis of Massive Data Sets." *Nature Biotechnology* 35  
374 (11): 1026–28.
- 375 Timmers, Peer H. A., Charlotte D. Vavourakis, Robbert Kleerebezem, Jaap S. Sinninghe  
376 Damsté, Gerard Muyzer, Alfons J. M. Stams, Dimity Y. Sorokin, and Caroline M.  
377 Plugge. 2018. "Metabolism and Occurrence of Methanogenic and Sulfate-Reducing  
378 Syntrophic Acetate Oxidizing Communities in Haloalkaline Environments." *Frontiers*  
379 *in Microbiology* 9 (December): 3039.
- 380 Zurita Rendón, Olga, Lissiene Silva Neiva, Florin Sasarman, and Eric A. Shoubridge. 2014.  
381 "The Arginine Methyltransferase NDUFAF7 Is Essential for Complex I Assembly and  
382 Early Vertebrate Embryogenesis." *Human Molecular Genetics* 23 (19): 5159–70.

Tree scale: 0.1

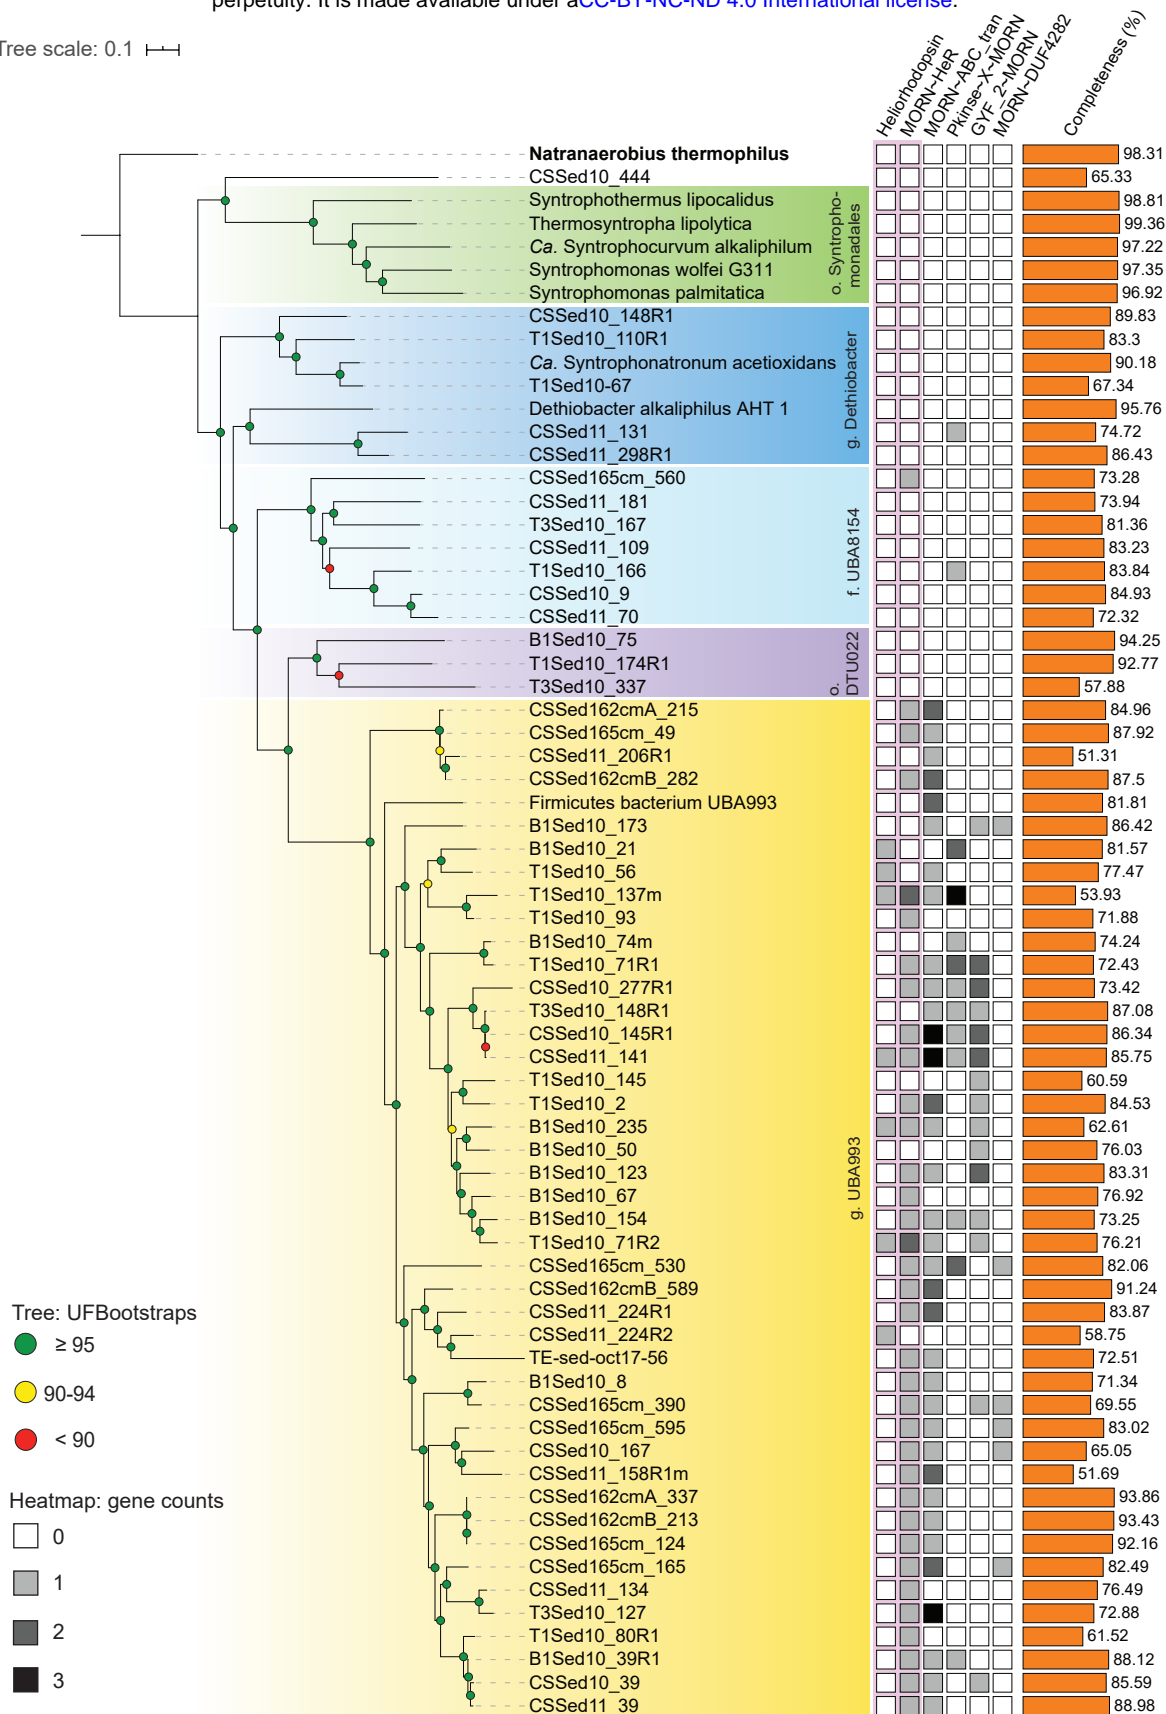

**Supplementary Figure 1.** Phylogenomic tree of MORN-HeliORhodopsin (MORN-HeR) encoding MAGs. Green circles indicate high confidence UFBootstrap values ( $\geq 95$ ). Occurrences of genes encoding heliorhodopsins, MORN-heliORhodopsin as well as other MORN-domain fusions are depicted in the adjacent matrix. Genome completeness values are depicted as a histogram (estimated by CheckM). All genomes are members of the *Firmicutes* phylum, with different taxonomic subdivisions highlighted on the tree (taxonomy by GTDBtk). *Natranaerobius thermophilus* was used to root the tree. The majority of genomes included here have been previously used for phylogenomic analyses by Timmers et. al, 2018. Among reference genomes, *Firmicutes bacterium UBA993* and *Ca. Syntrophocurvum alkaliphilum* are new additions.

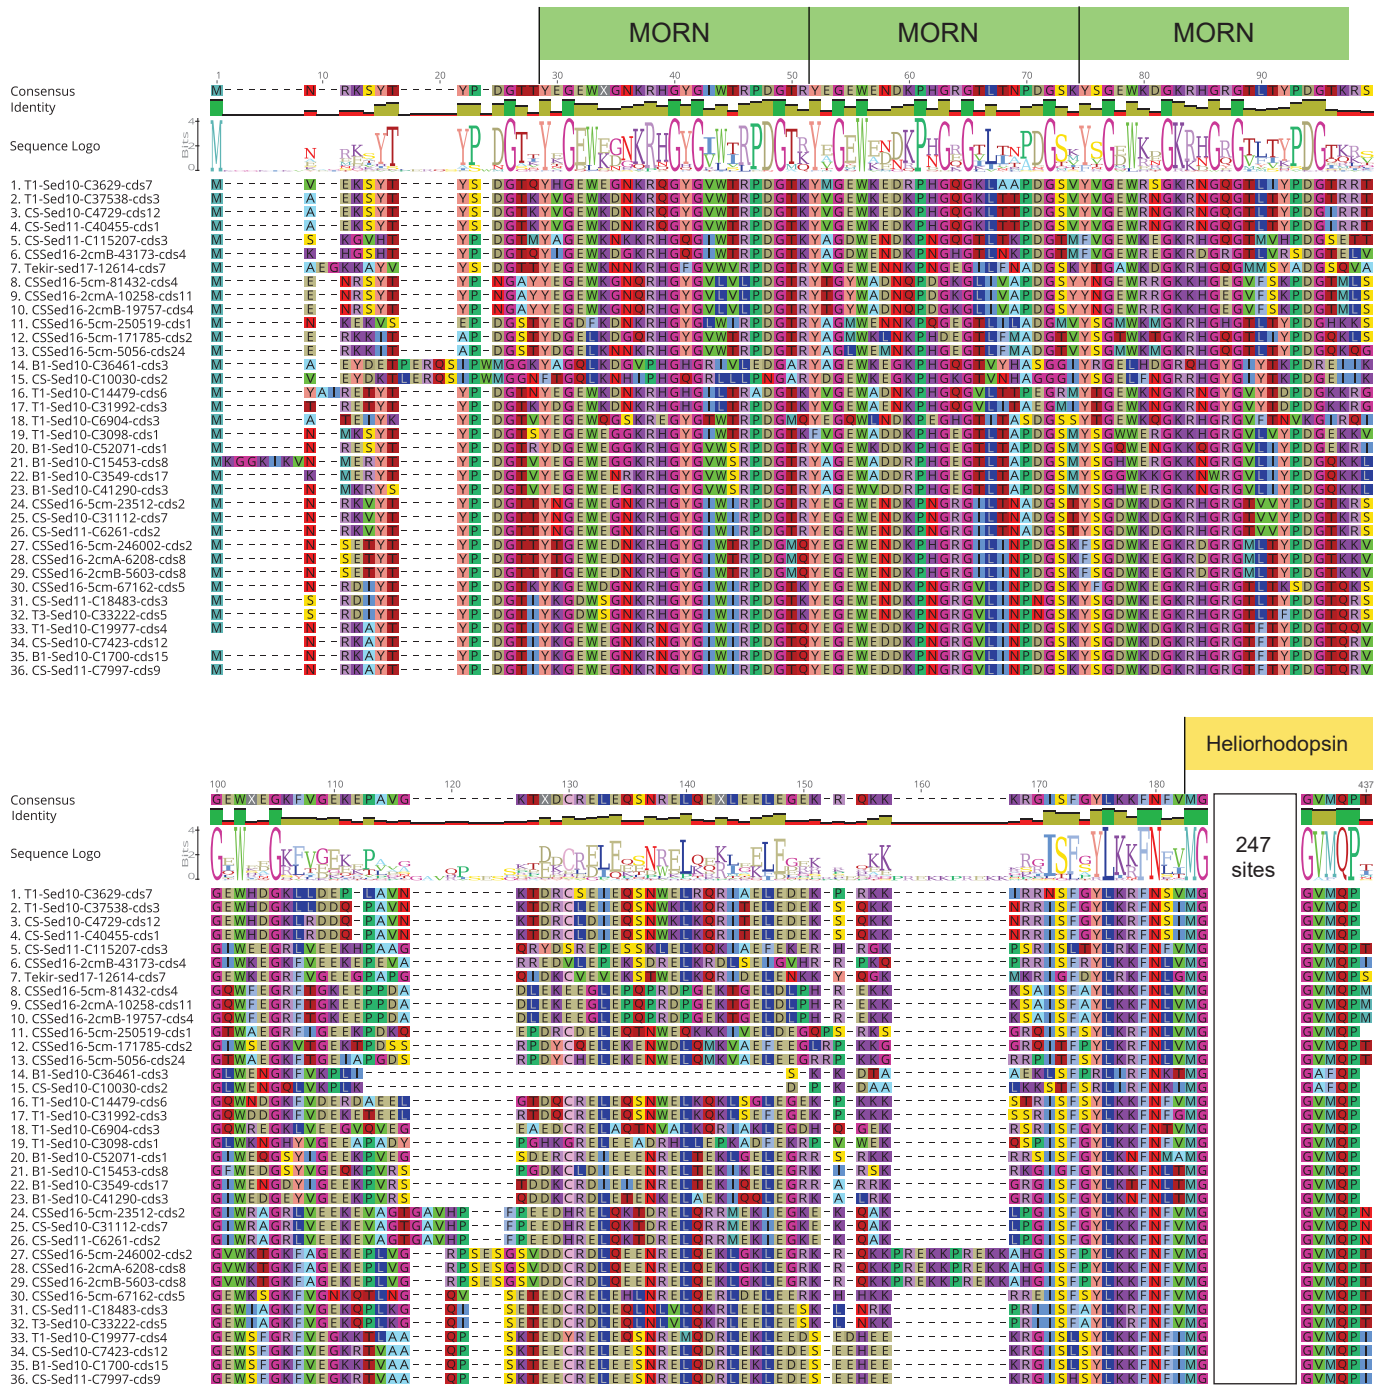

**Supplementary Figure 2.** Multiple sequence alignment of MORN-HeR protein domain fusions predicted in Firmicutes MAGs. Each sequence shows 3 consecutive MORN domains (indicated by green rectangles). Aligned HeR domains display a high level of conservation and are truncated for illustration purposes (indicated by yellow rectangle). The original full-length alignment was deposited in FigShare.

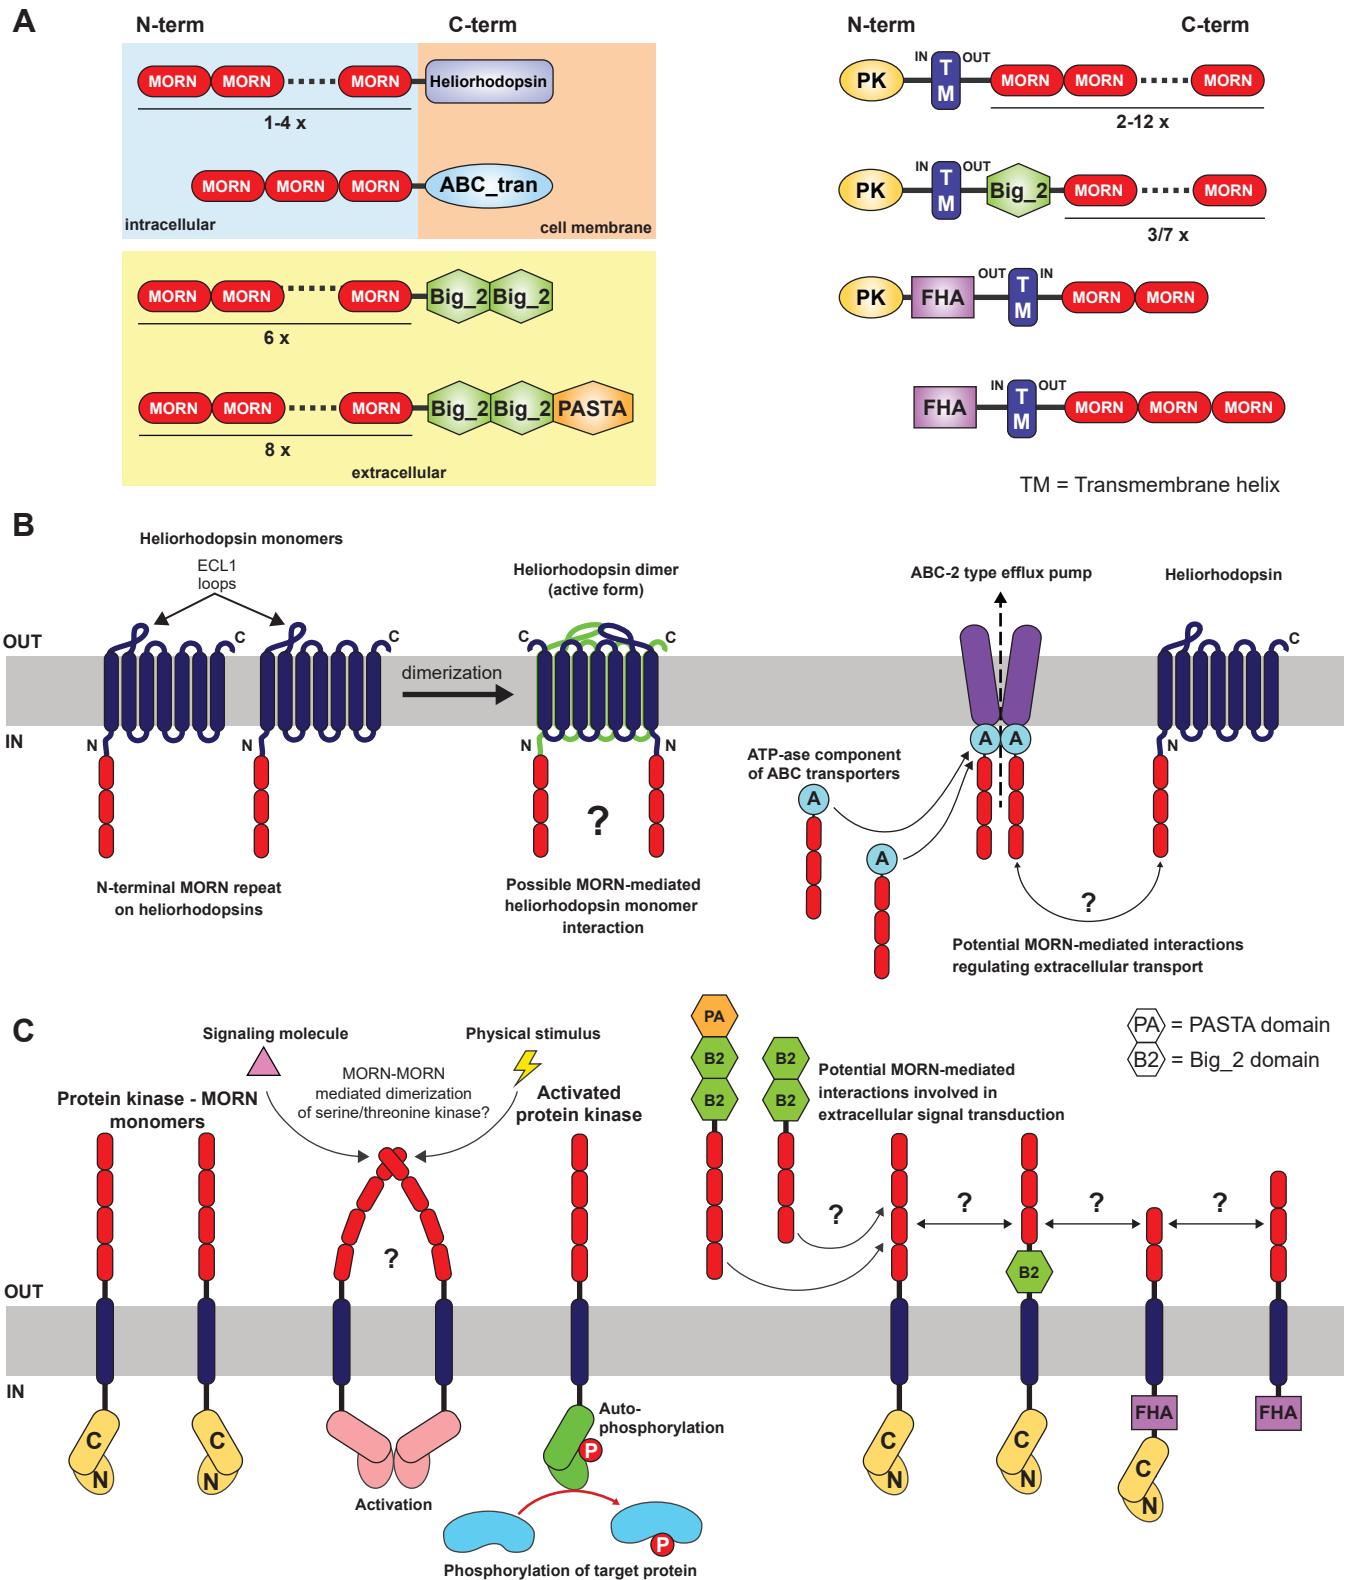

**Supplementary Figure 3.** Summary of MORN-repeat proteins predicted from metagenome-assembled genomes (MAGs) of anaerobic Firmicutes. **A**). Schematics of frequently co-occurring MORN-repeat containing proteins in Firmicutes MAGs including MORN-HeR, MORN-ABC transporters - likely involved in drug resistance or  $\text{Cu}^{2+}/\text{Na}^{2+}$  ion efflux, periplasmic proteins containing bacterial immunoglobulin-like folds (Big\_2, PASTA), MORN-protein kinase fusions where MORN repeats and p-kinase domains are commonly separated by transmembrane  $\alpha$ -helices on opposite sides of the cellular membrane and MORN-forkhead associated (FHA) domains. **B**) Potential interactions between MORN-HeR monomers, MORN-ATPase components of ABC transporters and MORN-HeR and ABC transporters mediated or stabilized by the presence of MORN-repeat fusions. **C**) Potential interactions of MORN-Protein-kinases associated with functions such as extracellular signal transduction.

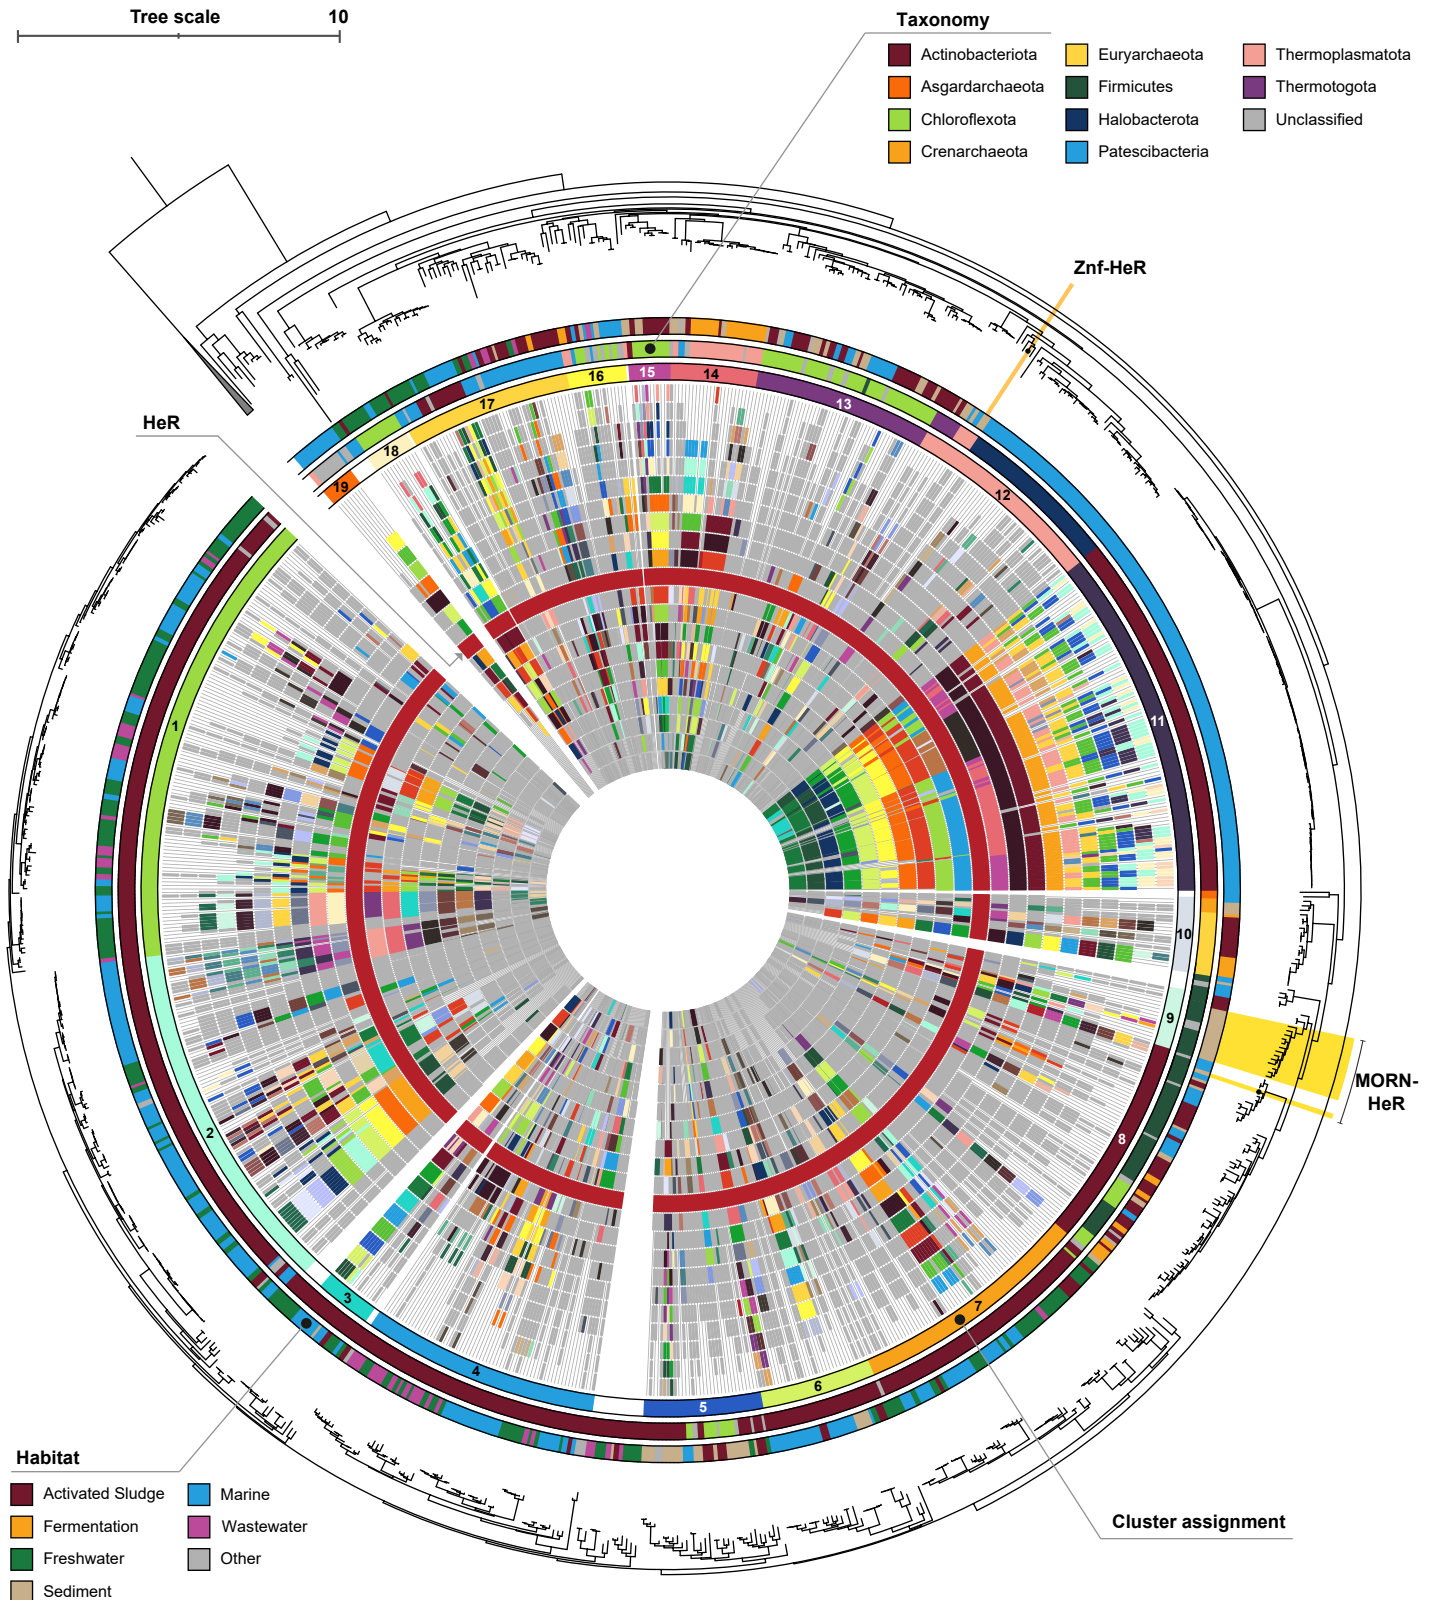

**Supplementary Figure 4.** Genomic context of heliorhodopsin (HeR) genes across representative taxonomic groups. The phylogenetic tree was constructed using 872 HeR amino acid sequences and 30 proteorhodopsins used as an outgroup for rooting. Gene neighbourhoods (10 genes up- and downstream) for each HeR were depicted schematically. Abundant homologues are coloured within each defined phylogenetic cluster while less abundant genes and/or singletons are depicted in gray. All contigs were centered and oriented according to encoded HeR (dark red circle). Information regarding relative gene lengths was not included. Particular HeR-protein domain fusions are indicated separately: Znf-HeR and MORN-HeR.

**Supplementary Figure 5. Histidine kinases and related genes (blue labels) in the genomic neighborhood (within 10 kb) of Heliorhodopsins (red labels) originating from the phylum Chloroflexi.**

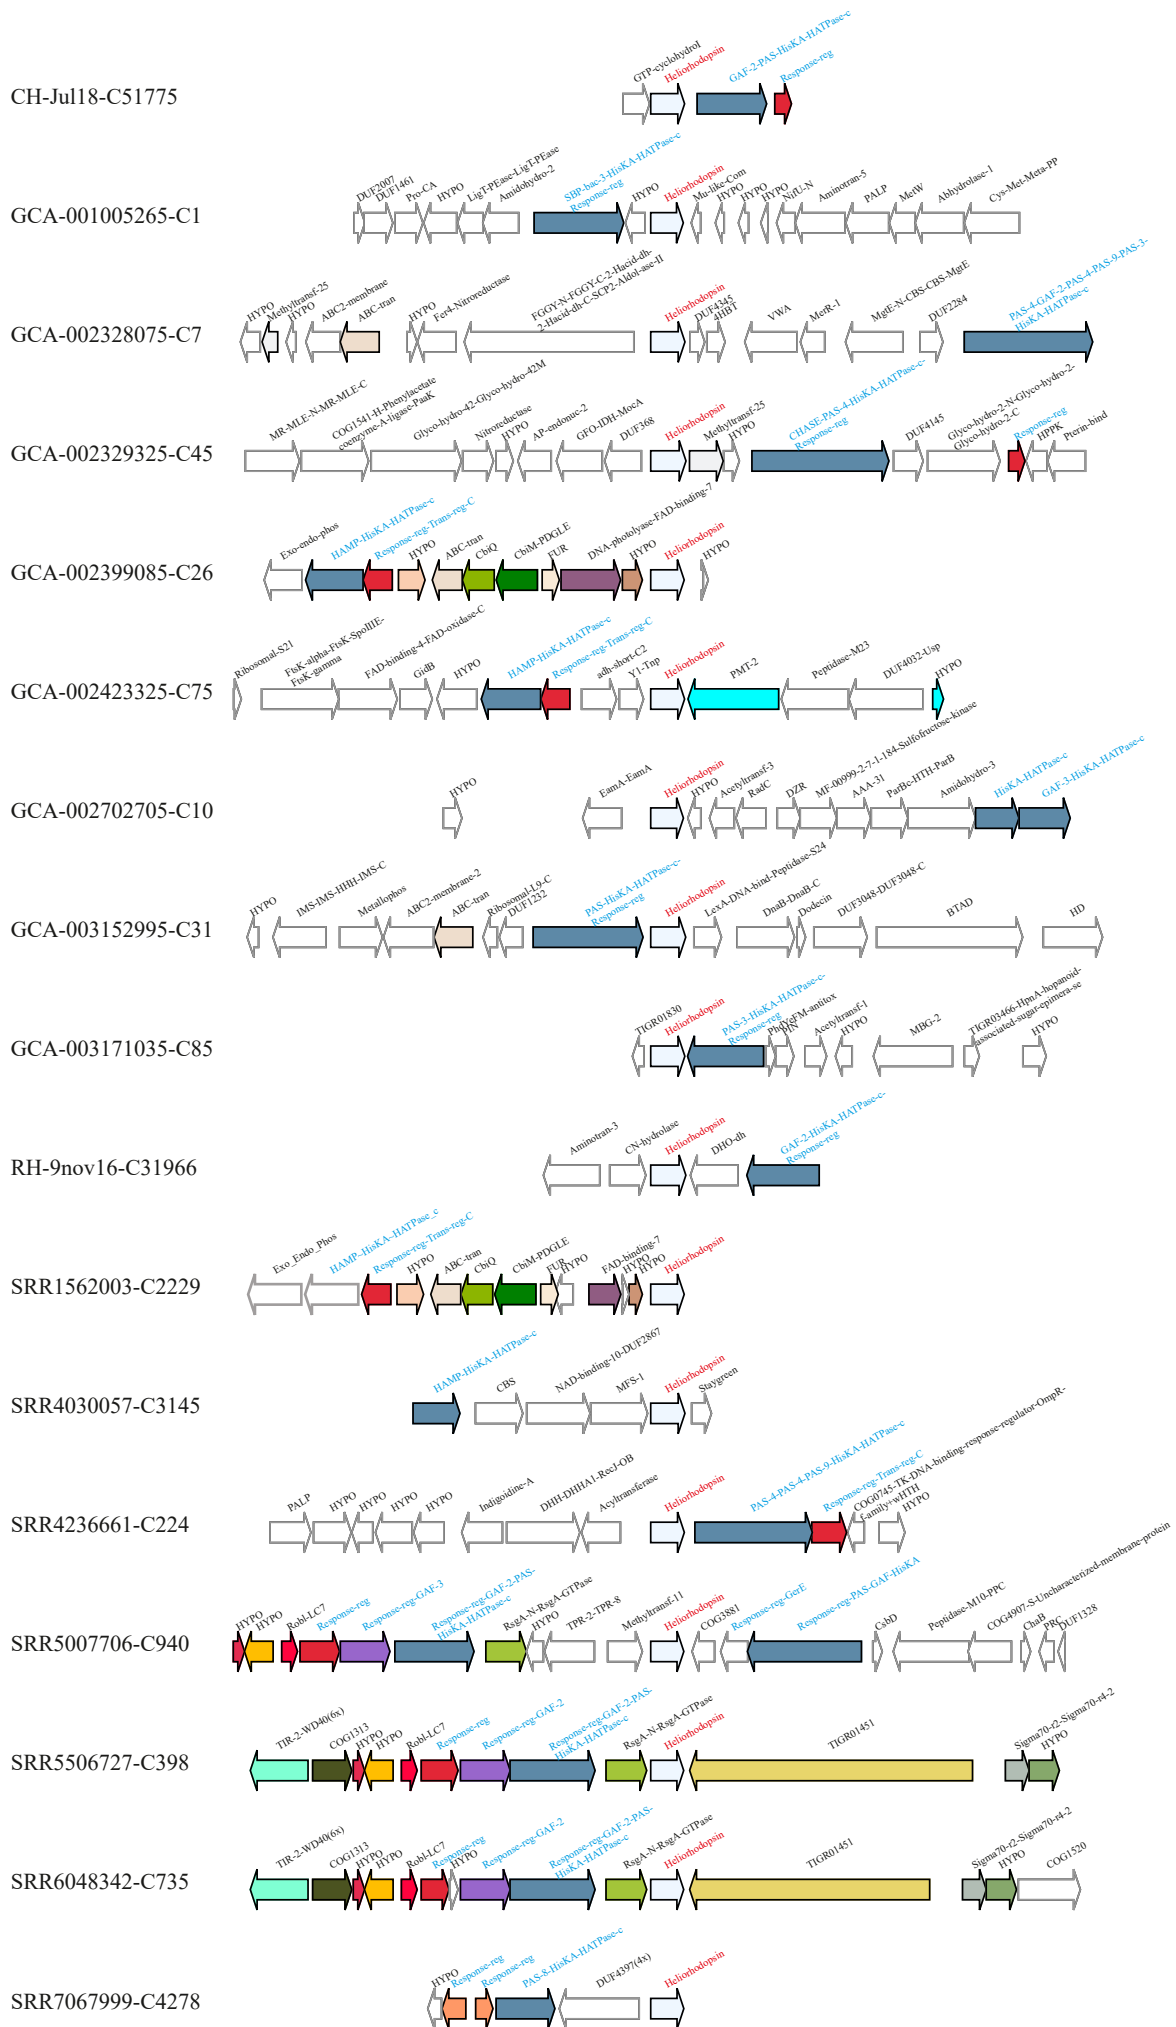



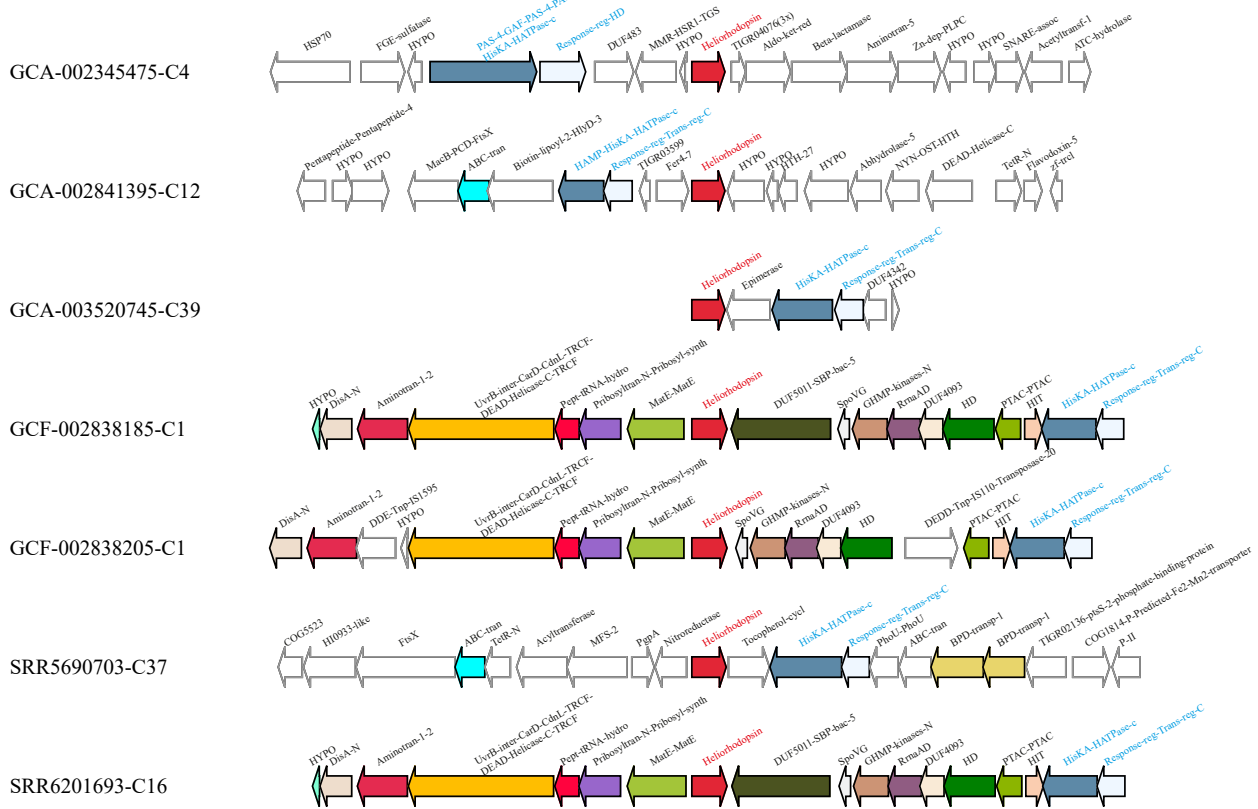

**Supplementary Figure 7. Histidine kinases and related genes (blue labels) in the genomic neighborhood (within 10 kb) of Heliorhodopsins (red labels) originating from the phylum Patescibacteria.**

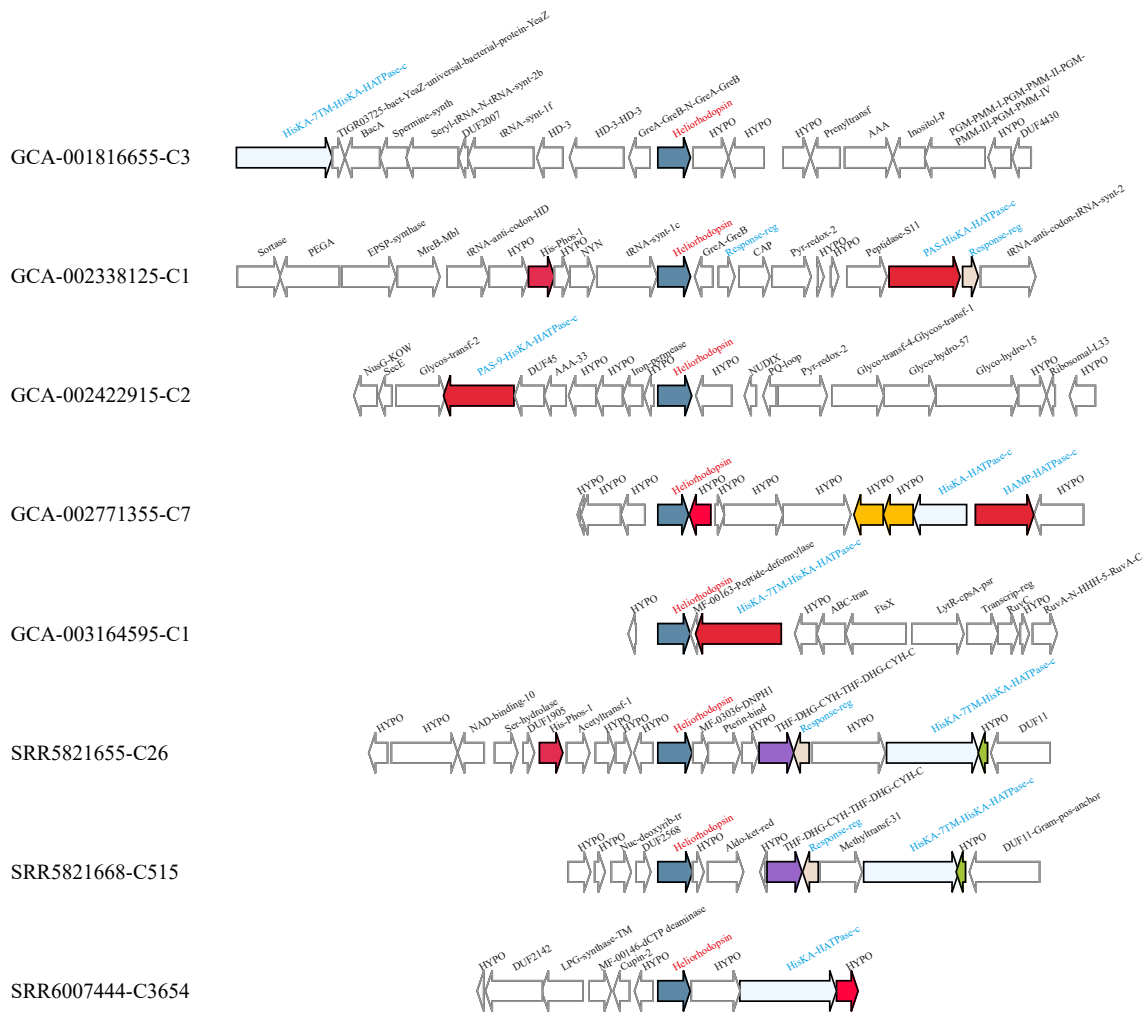

bioRxiv preprint doi: <https://doi.org/10.1101/2021.02.01.429150>; this version posted February 2, 2021. The copyright holder for this preprint (which was not certified by peer review) is the author/funder, who has granted bioRxiv a license to display the preprint in perpetuity. It is made available under aCC-BY-NC-ND 4.0 International license.

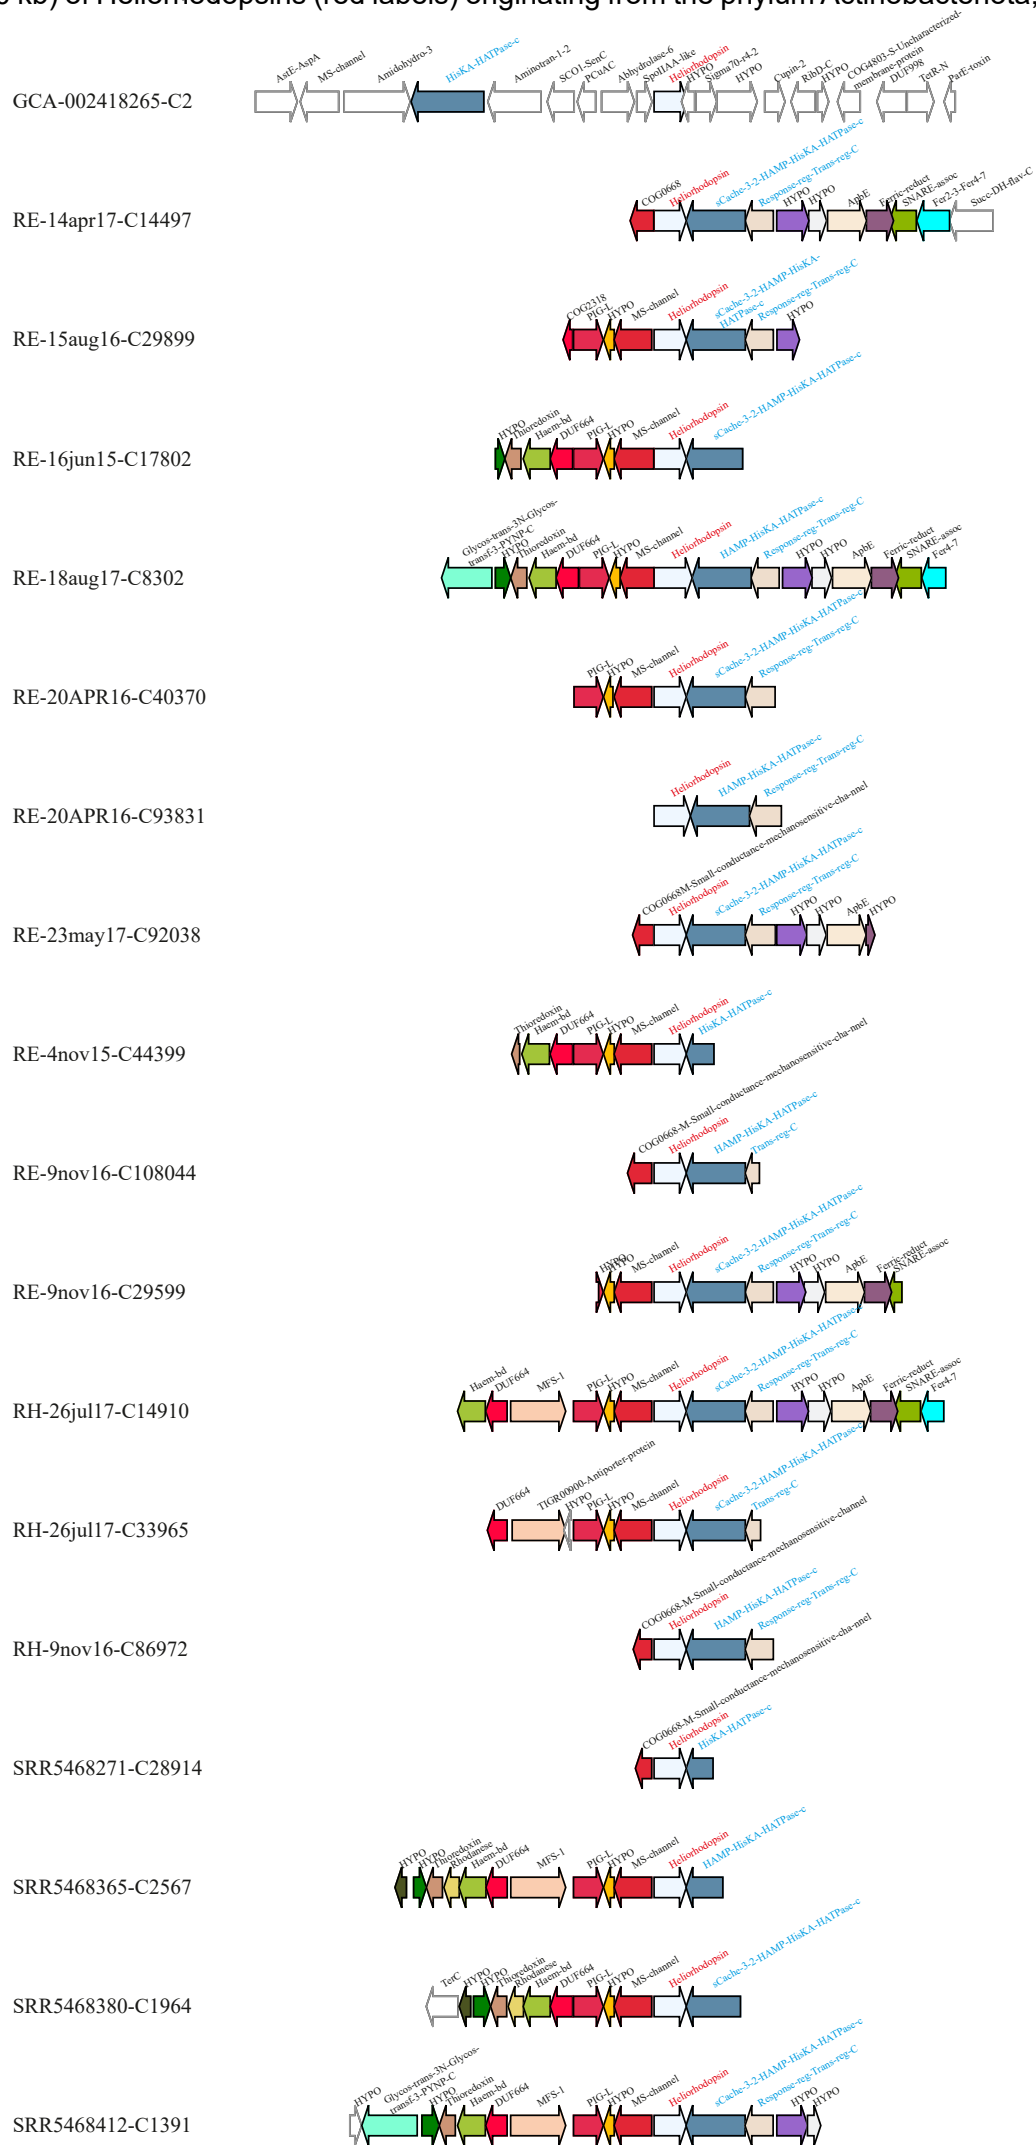

GCA-002693615-C113

GCA-002698575-C11

GCA-002729155-C71

GCA-002737595-C1

GCF-000721705-C42

GCF-002929535-C20

GCF-003073135-C6

GCF-900091585-C1

Jr-28aug17-C3048

Jr-7aug17-C3953

RE-23may17-C20662

RE-4nov15-C377

RH-14apr17-C12203

RH-14apr17-C277

RH-18aug17-C51518

RH-26jul17-C41144

SRR3961935-C67

SRR3962293-C33

SRR3962508-C37

SRR3963456-C335

SRR5468211-C1

SRR5468365-C469

SRR5821668-C164

SRR5821670-C88

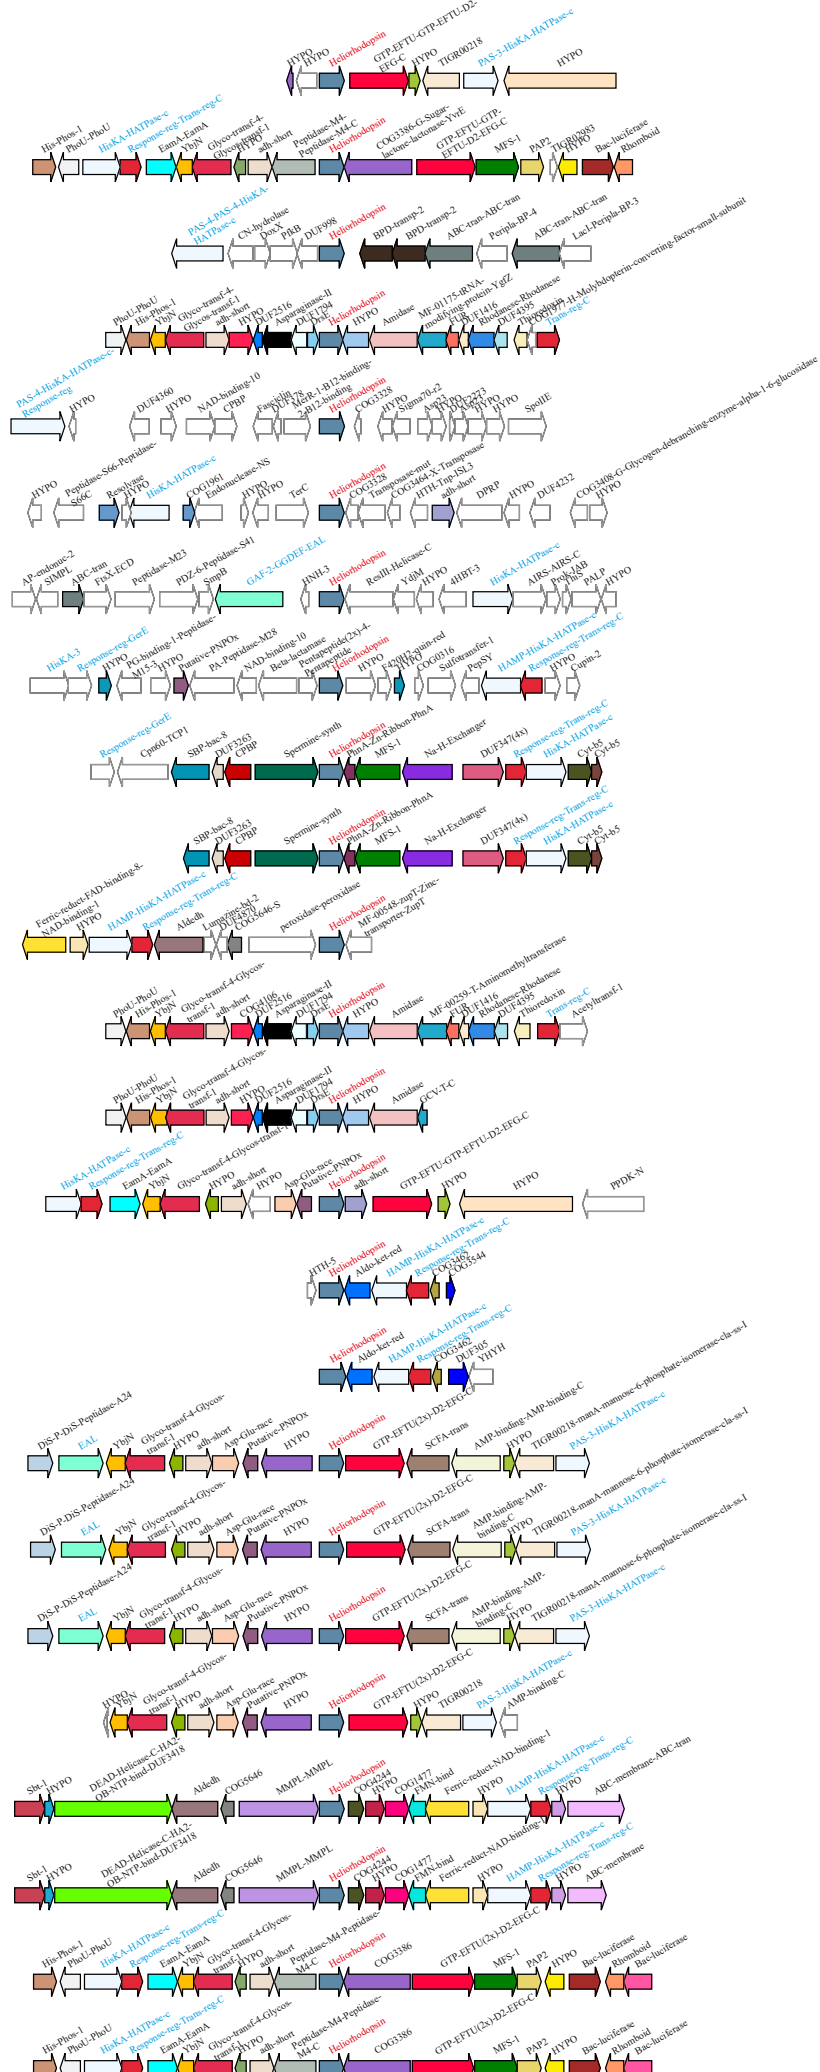

**Supplementary Figure 10: Histidine kinases and related genes (blue labels) in the genomic neighborhood (within 10 kb) of Heliorhodopsins (red labels) originating from the phylum Actinobacteriota, class Coriobacteriia.**

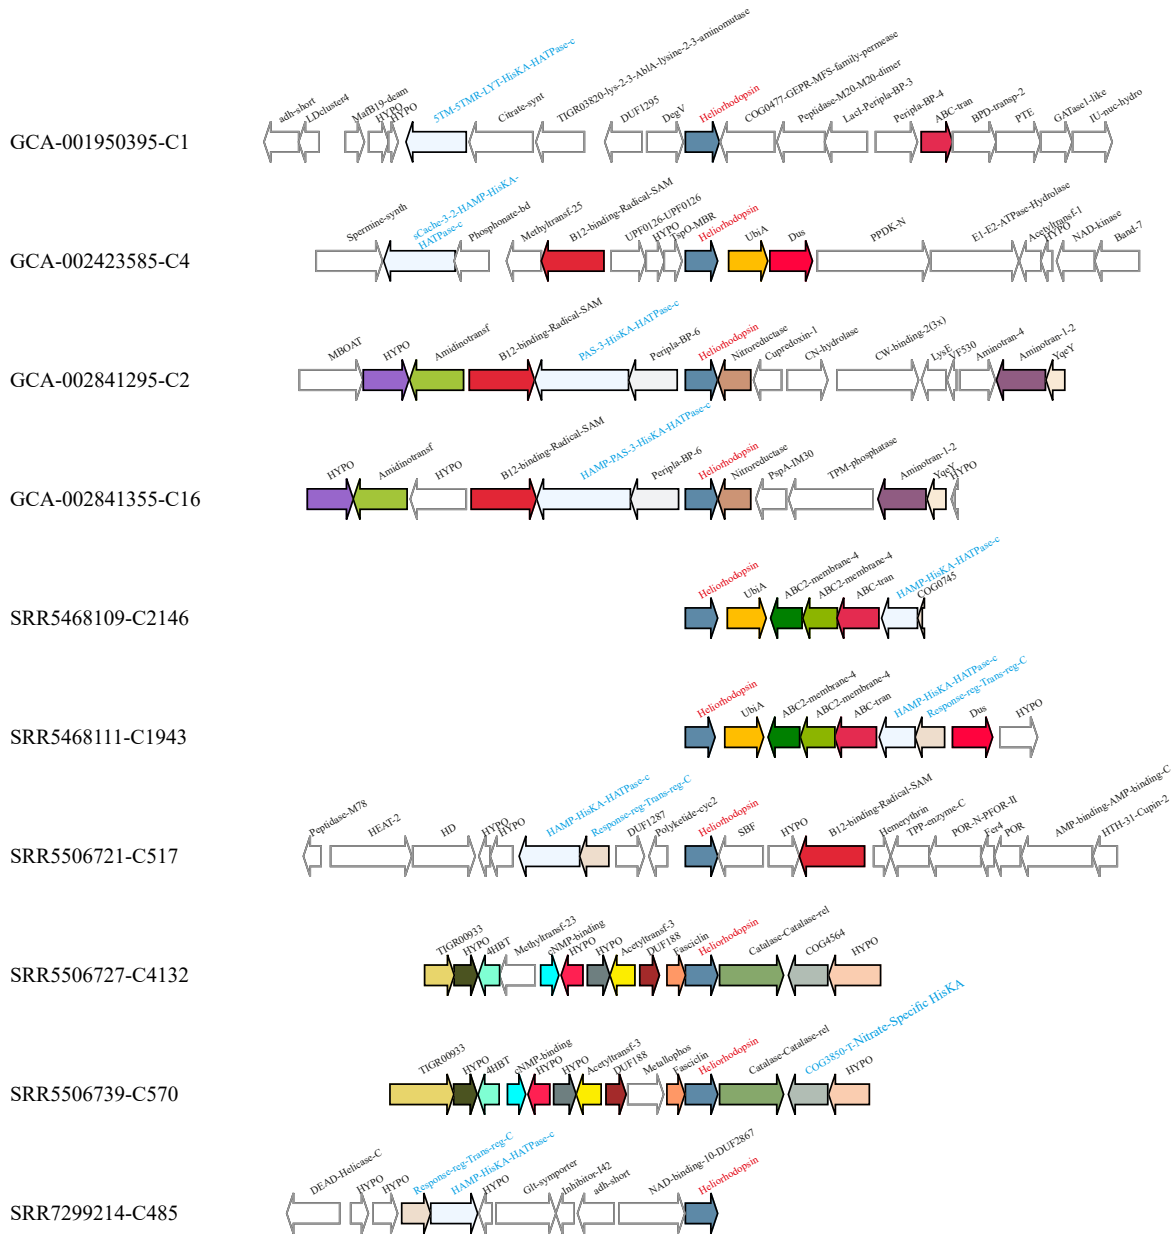

**Supplementary Figure 11. Histidine kinases and related genes (blue labels) in the genomic neighborhood (within 10 kb) of Heliorhodopsins (red labels) originating from the phylum Actinobacteriota (classes RBG-13-55-18 and Thermoleophilia), phylum Dictyoglomota (class Dictyoglomia) and phylum Thermoplasmata (class E2).**

phylum Actinobacteriota, class RBG-13-55-18

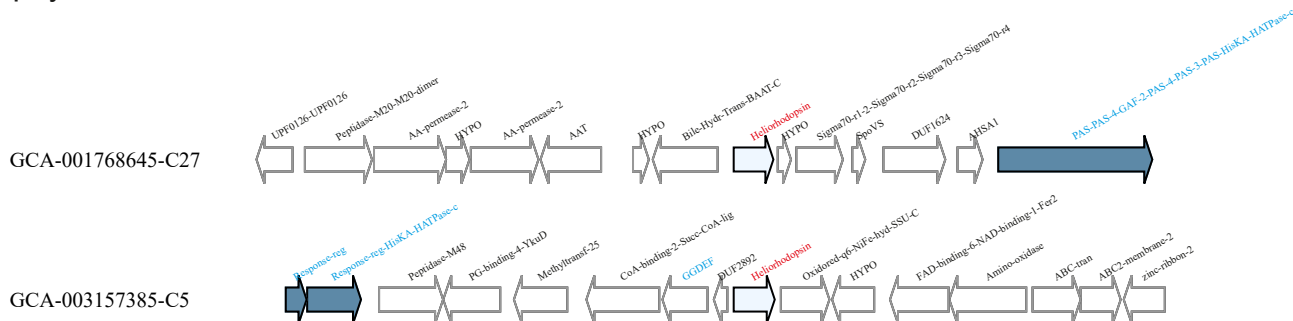

phylum Actinobacteriota, class Thermoleophilia

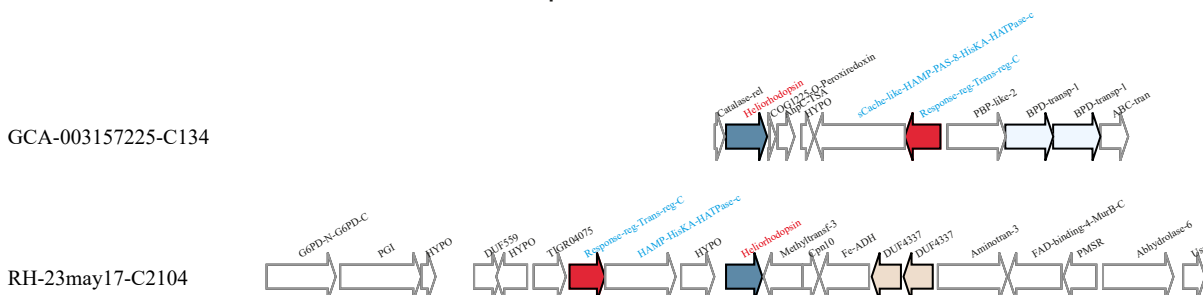

phylum Dictyoglomota, class Dictyoglomia

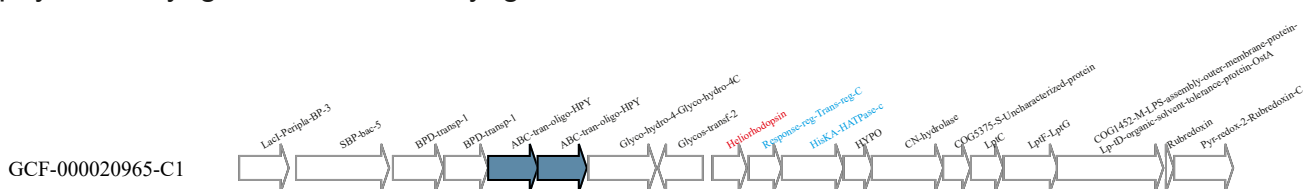

phylum Thermoplasmata, class E2

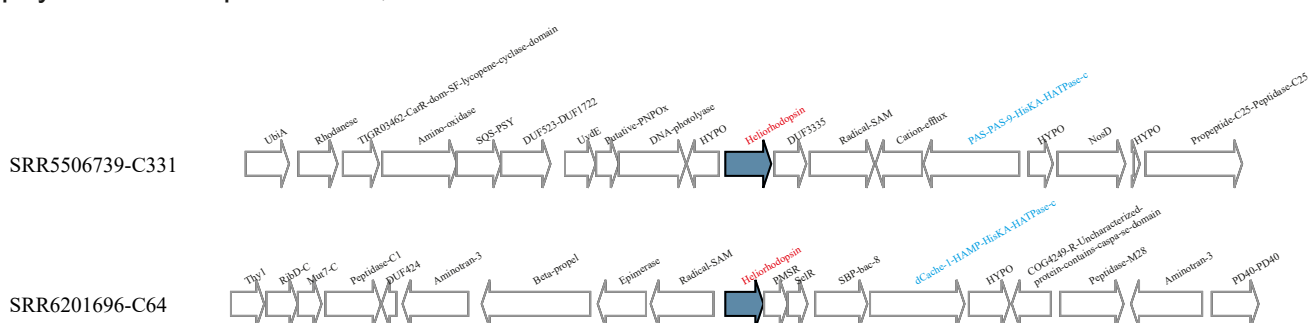

**Supplementary Figure 2. Histidine kinases and related genes (blue labels) in the genomic neighborhood (within 10 kb) of Heliorhodopsins (red labels) originating from the phylum Halobacterota, class Halobacteria.**

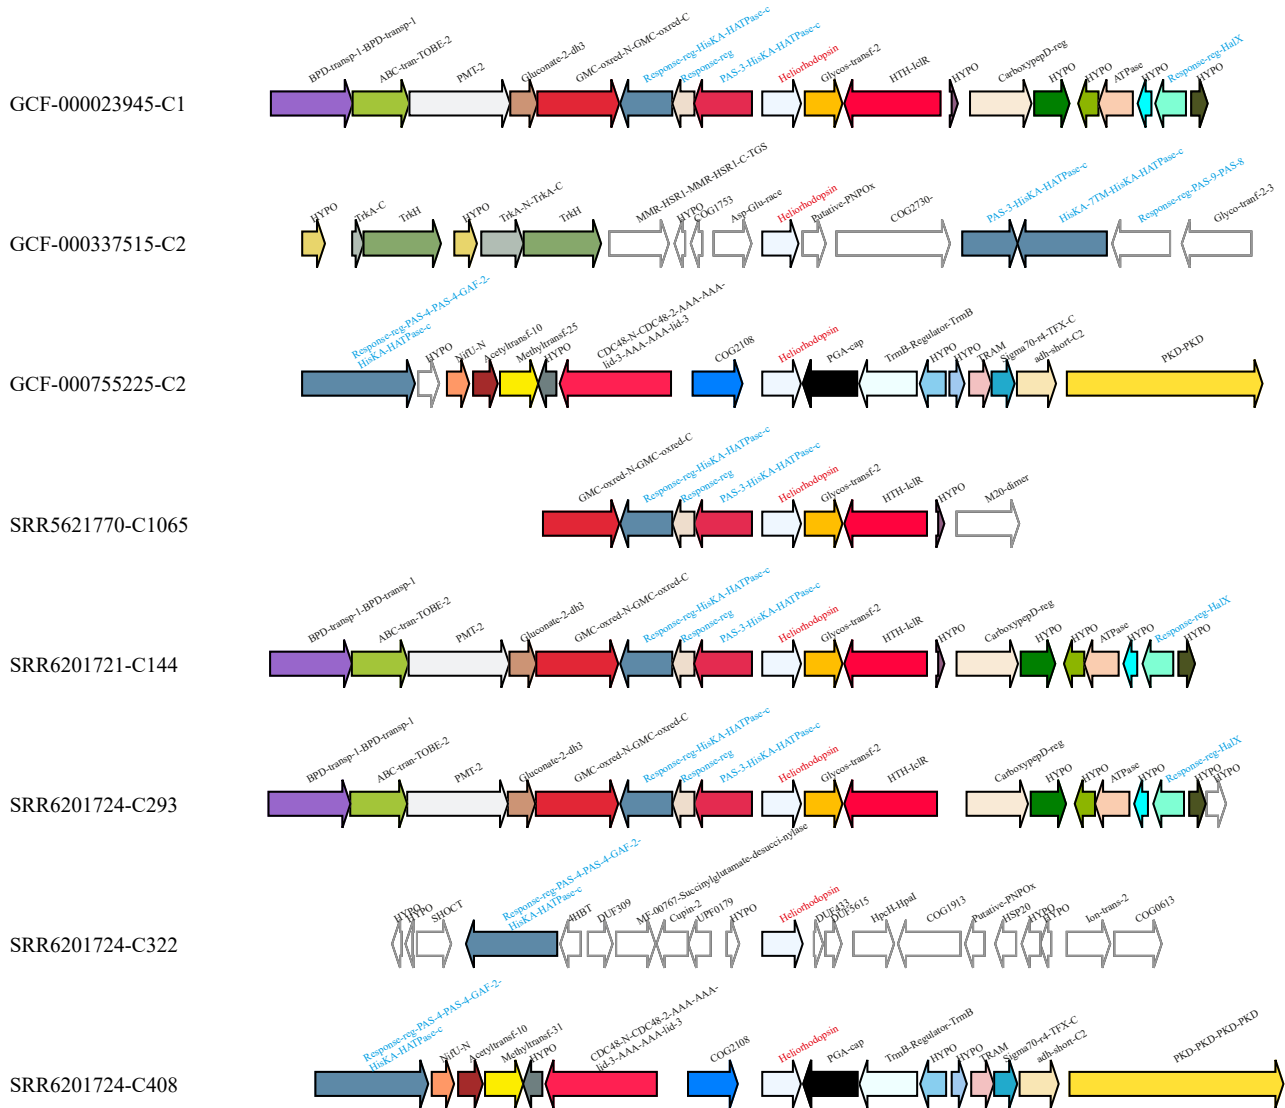

**Supplementary Figure 13. Histidine kinases and related genes (blue labels) in the genomic neighborhood (within 10 kb) of MORN-Heliiorhodopsins (red labels) originating from Firmicutes (phylum) MAGs (sediment and brine metagenomes).**

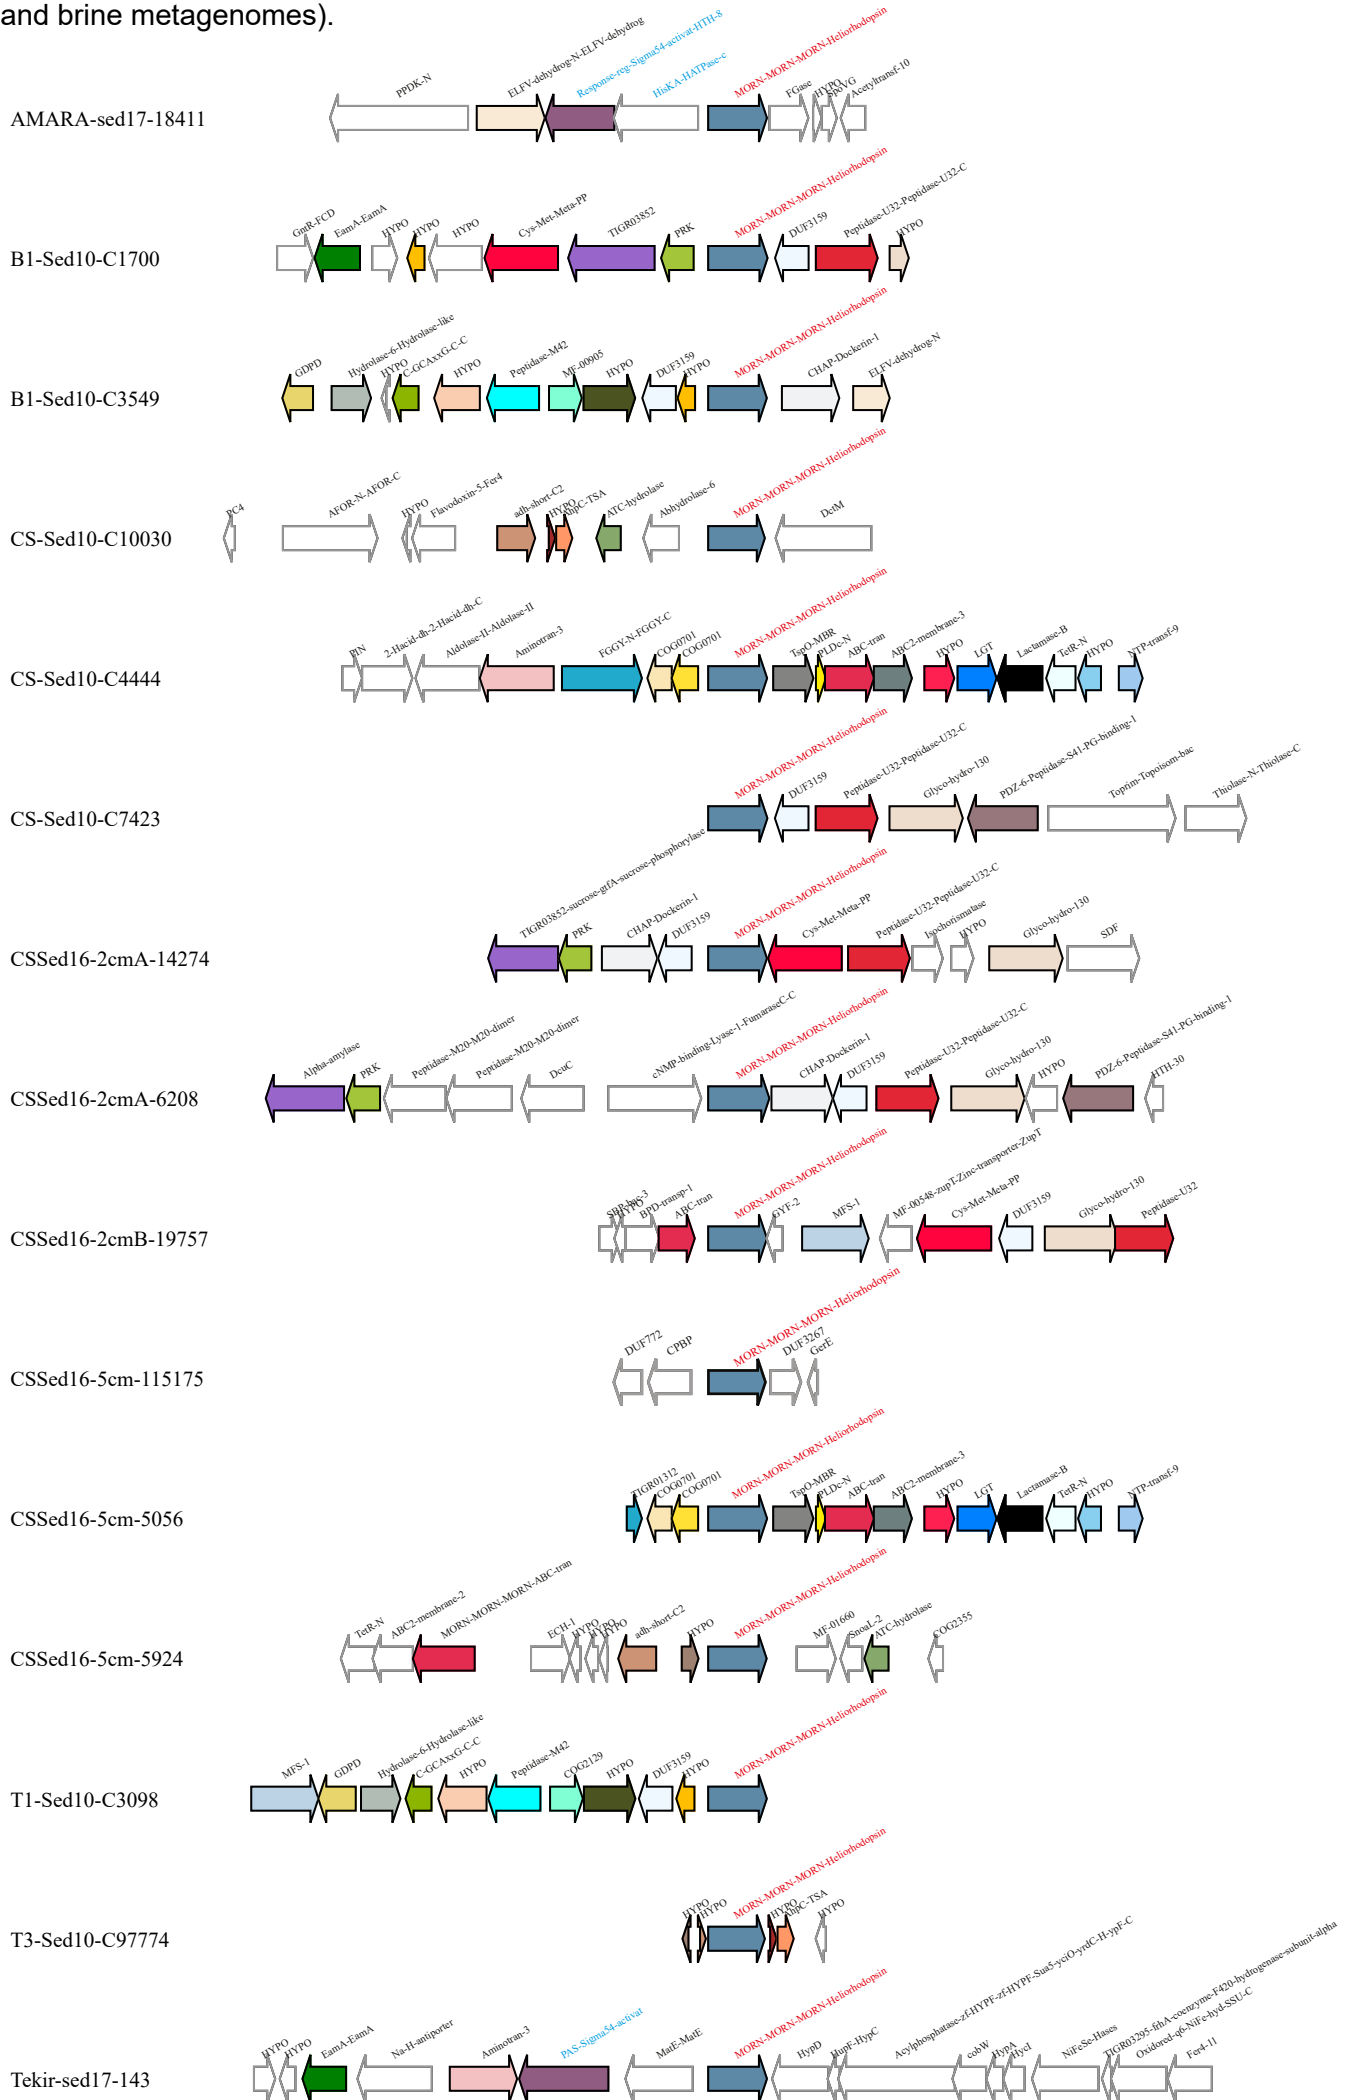



**Supplementary Figure 14.** Genomic neighborhood (within 10 kb) of Zn<sup>2+</sup>-Heliorhodopsins (red labels) originating from archaeal contigs from the phylum Thermoplasmatales, class E2.

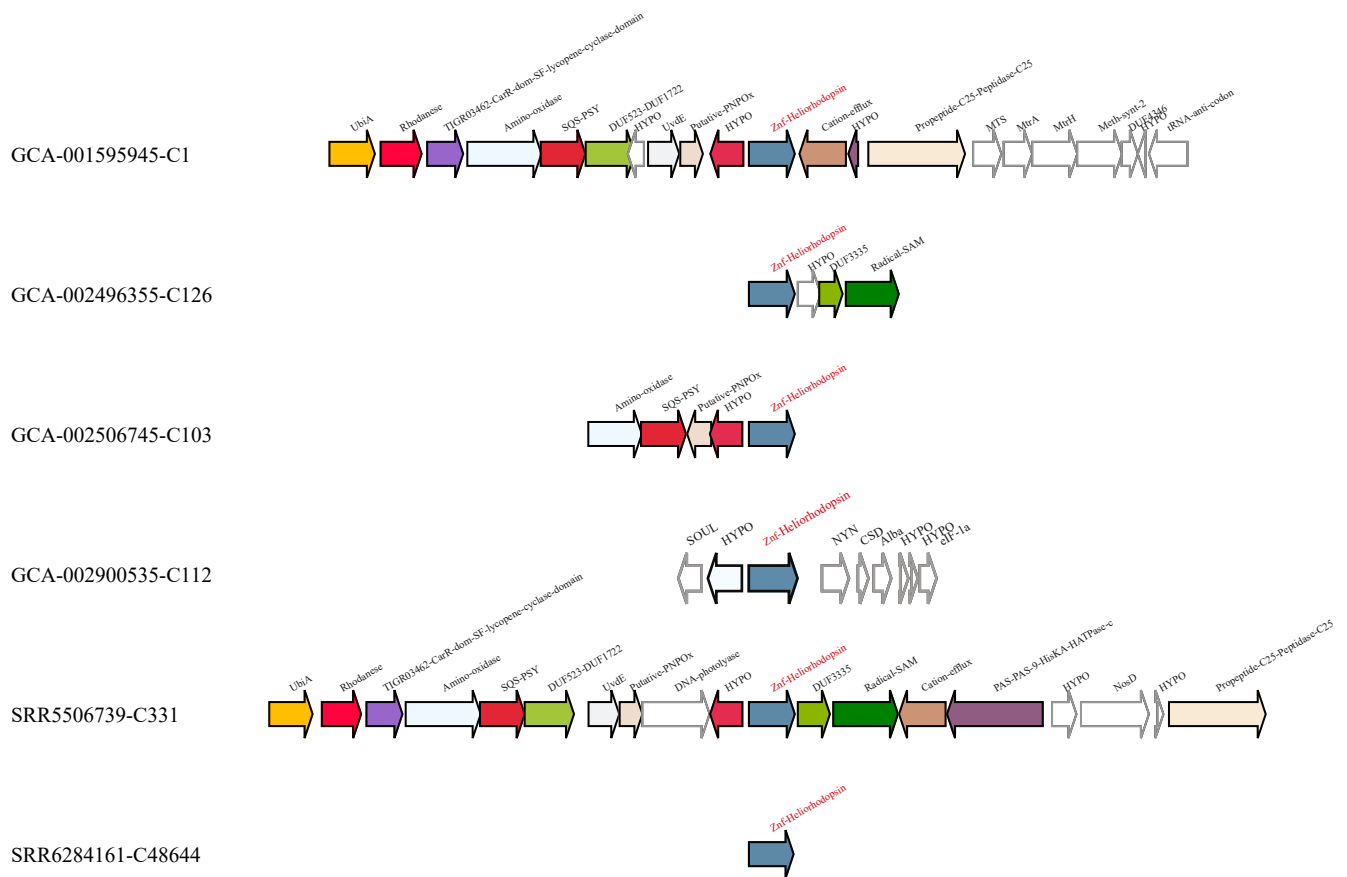

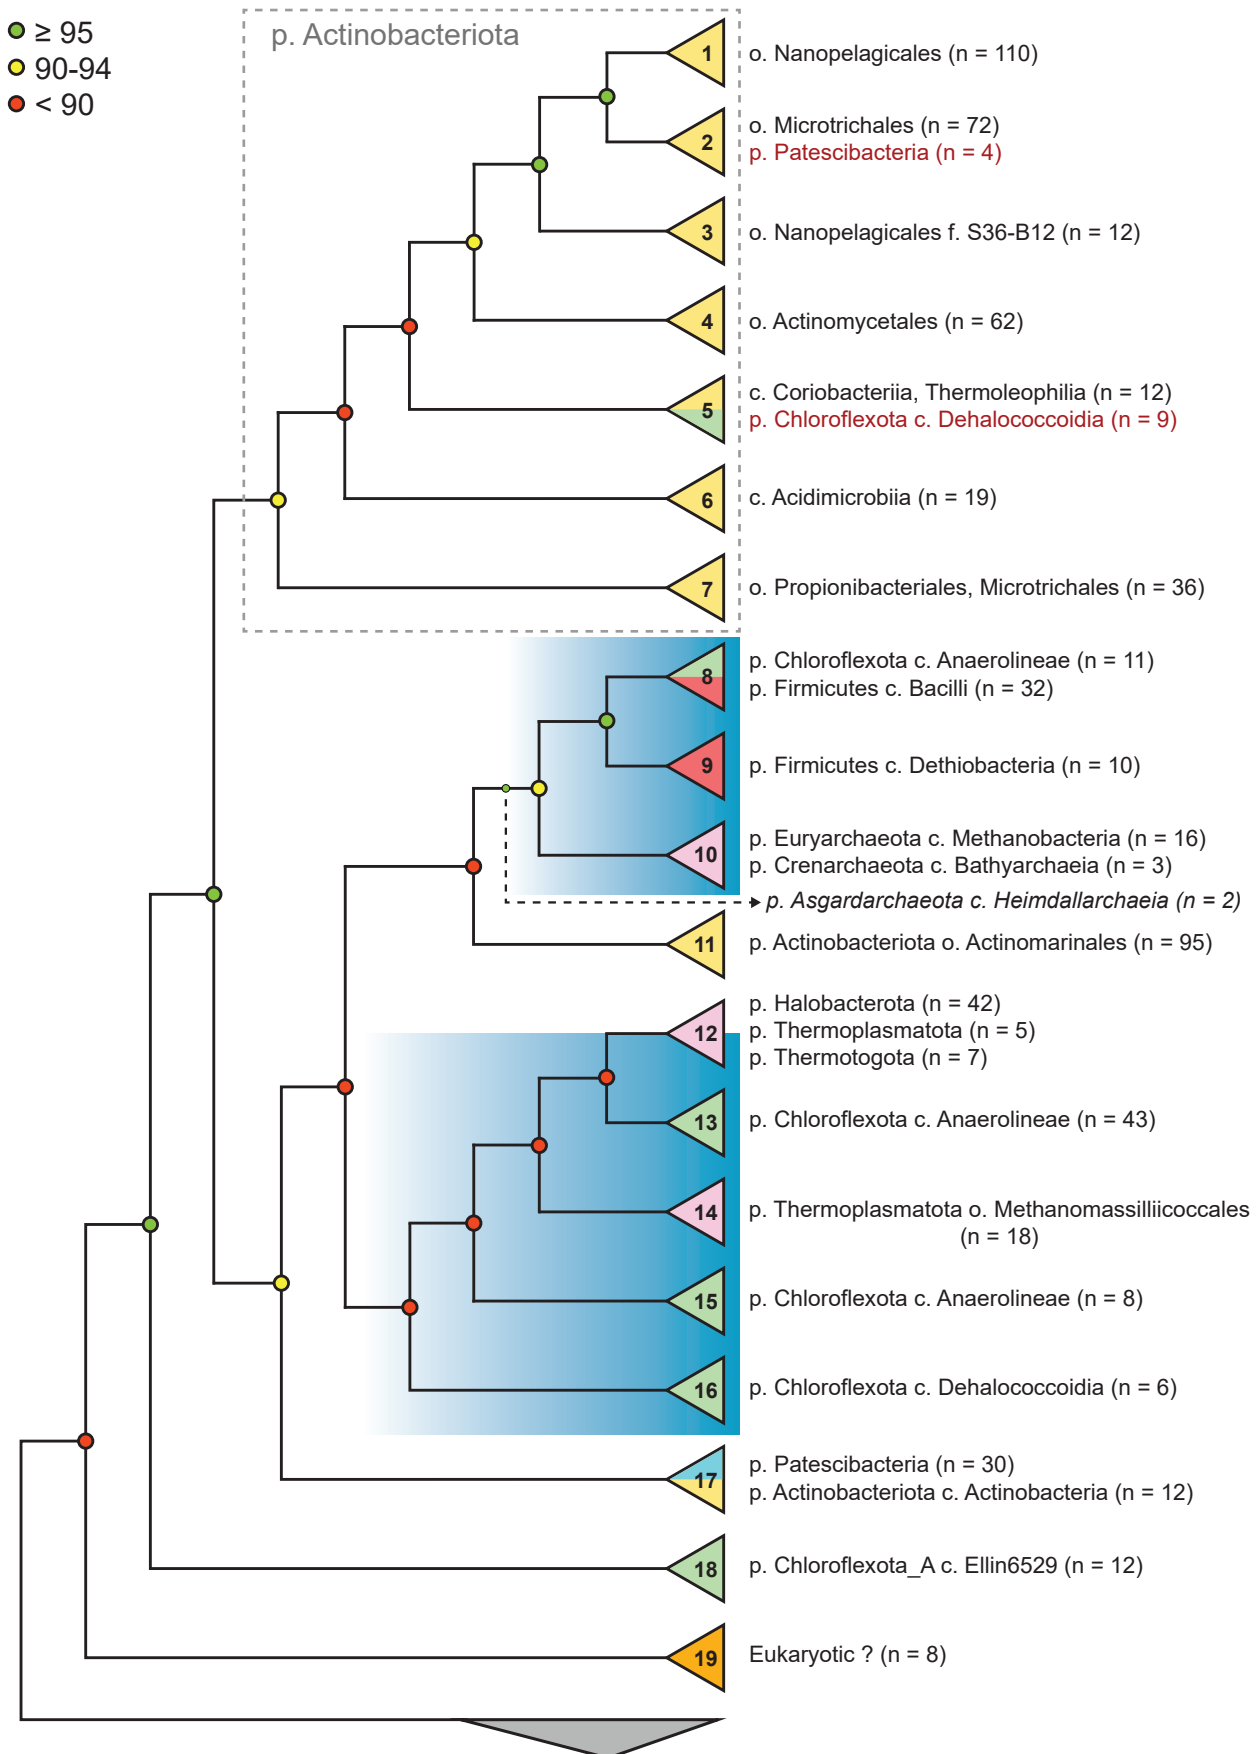

**Supplementary Figure 15.** Simplified representation (cladogram) of the HeR phylogenetic tree used for gene context analysis. Cluster numbers (defined in Supp. Fig. 4) are indicated on triangles at the tip of each branch. Actinobacteriota clusters are coloured yellow, Archaea - purple, Chloroflexota - green, Eukaryota - orange, Firmicutes - red, Patescibacteria - blue. Taxonomy and sequence counts are shown - only for representatives of each cluster. The blue rectangles highlight clusters where all or most members are anaerobic organisms. The outgroup (proteorhodopsins; n = 30) is depicted as a gray triangle at the bottom.
